# Supplementary material for: Pemphigus Vulgaris Autoantibody Profiling by Proteomic Technique
Source: PubMed Central journal article supplement (PMC3591405; doi:10.1371/journal.pone.0057587), 2013-03-07
Supplement: pone.0057587.s001.pdf [file pone.0057587.s001.pdf]

**Supplemental Table 1. Reactivities of patient and control sera on protein microarrays\***

| Symbol              | Name                                                            | Patients | Controls | Ratio |
|---------------------|-----------------------------------------------------------------|----------|----------|-------|
| <b>HLA-DRA</b>      | Major histocompatibility complex, class II, DR alpha            | 45%      | 7%       | 6.22  |
| <b>DSC3</b>         | Desmocollin 3 isoform Dsc3a preproprotein                       | 44%      | 7%       | 6.12  |
| <b>DSC1</b>         | Desmocollin 1 isoform Dsc1a preproprotein                       | 44%      | 7%       | 6.06  |
| <b>ATP2C1-V4</b>    | ATPase, Ca <sup>++</sup> transporting, type 2C                  | 43%      | 5%       | 8.51  |
| <b>PKP3</b>         | Plakophilin 3                                                   | 43%      | 7%       | 6.56  |
| <b>CHRM3</b>        | Cholinergic receptor, muscarinic 3                              | 42%      | 7%       | 5.85  |
| <b>COL21A1</b>      | Collagen, type XXI, alpha 1                                     | 42%      | 5%       | 8.36  |
| <b>ANXA8L1</b>      | AnnexinA8 like 1                                                | 42%      | 6%       | 7.19  |
| <b>CD88, C5AR1</b>  | Complement component 5a receptor 1 (C5AR1), mRNA                | 42%      | 5%       | 8.21  |
| <b>CHRNE</b>        | Cholinergic receptor, nicotinic,epsilon                         | 41%      | 7%       | 5.70  |
| <b>ITGA2</b>        | Integrin alpha 2 precursor                                      | 39%      | 6%       | 6.80  |
| <b>PCDH12</b>       | Protocadherin 12 precursor                                      | 39%      | 7%       | 6.04  |
| <b>CD1D</b>         | CD1d molecule                                                   | 39%      | 7%       | 5.38  |
| <b>ITGB5</b>        | Integrin, beta 5                                                | 39%      | 6%       | 6.73  |
| <b>HLA-DQB1</b>     | Major histocompatibility complex, class II, DQ beta 1           | 38%      | 7%       | 5.23  |
| <b>COL2A1</b>       | Collagen, type II, alpha 1                                      | 38%      | 7%       | 5.75  |
| <b>CD59</b>         | CD59 molecule, complement regulatory protein                    | 37%      | 7%       | 5.63  |
| <b>DSG3-EC4</b>     | Desmoglein 3                                                    | 36%      | 7%       | 5.58  |
| <b>CD44</b>         | CD44 molecule (Indian bloodGroup)                               | 36%      | 6%       | 6.21  |
| <b>CD80</b>         | CD80 molecule                                                   | 36%      | 5%       | 7.09  |
| <b>CHRM1</b>        | Cholinergic receptor, muscarinic 1                              | 36%      | 6%       | 6.21  |
| <b>ANXA5</b>        | Annexin 5                                                       | 36%      | 5%       | 7.02  |
| <b>HLA-DQA1</b>     | Major histocompatibility complex, class II, DQ alpha 1          | 36%      | 7%       | 5.46  |
| <b>CD23, FCER2</b>  | Fc fragment of IgE, low affinity II, receptor for (CD23)        | 35%      | 7%       | 5.40  |
| <b>ITGB3BP-V1</b>   | Integrin beta 3 binding protein, isoform 1                      | 34%      | 6%       | 5.95  |
| <b>CD86</b>         | CD86 molecule-costimulatory signal for activation of the T-cell | 34%      | 6%       | 5.88  |
| <b>DSC3</b>         | Desmocollin 3 isoform Dsc3a preproprotein                       | 34%      | 6%       | 5.88  |
| <b>HLA-G</b>        | Major histocompatibility complex, class I,G                     | 34%      | 6%       | 5.88  |
| <b>HLA-DRB1</b>     | Major histocompatibility complex, class II, DR beta 1           | 33%      | 7%       | 5.11  |
| <b>CD49e, ITGA5</b> | Integrin, alpha 5 (fibronectin receptor, alpha polypeptide)     | 33%      | 4%       | 8.99  |
| <b>COL1A1</b>       | Collagen, type I, alpha 1                                       | 33%      | 4%       | 7.49  |
| <b>IL1RAPL2</b>     | Interleukin 18 receptor accessory protein                       | 33%      | 5%       | 6.42  |
| <b>CD26, DPP4</b>   | Dipeptidyl-peptidase 4                                          | 32%      | 5%       | 6.35  |
| <b>PC</b>           | Pyruvate carboxylase                                            | 32%      | 5%       | 6.35  |
| <b>PMP22</b>        | Peripheral myelin protein 22                                    | 32%      | 3%       | 10.98 |
| <b>CACNA1C</b>      | Calcium channel, voltage-dependent, L type,                     | 31%      | 6%       | 5.42  |
| <b>CHRNA1</b>       | Cholinergic receptor, nicotinic, alpha 1 isoform b              | 31%      | 6%       | 5.42  |
| <b>HLA-DPA1</b>     | Major histocompatibility complex, class II, DP alpha 1          | 31%      | 6%       | 5.42  |
| <b>CD56, NCAM2</b>  | Neural cell adhesion molecule 1                                 | 31%      | 7%       | 4.76  |
| <b>CDH1</b>         | Cadherin 1, type 1 preproprotein                                | 31%      | 7%       | 4.29  |
| <b>CHRNB4</b>       | Cholinergic receptor, nicotinic, beta 4                         | 31%      | 7%       | 4.76  |
| <b>PCDHAC2</b>      | Protocadherin alpha subfamily C, 2 isoform 1                    | 31%      | 6%       | 5.36  |
| <b>PERP</b>         | PerP, TP53 apoptosis effector                                   | 31%      | 5%       | 6.05  |
| <b>PMPCB</b>        | Mitochondrial processing peptidase beta subunit                 | 31%      | 4%       | 8.47  |
| <b>ACTA2</b>        | Actin, Alpha 2, smooth muscle, Aorta                            | 30%      | 6%       | 5.23  |
| <b>CHRNA5</b>       | Cholinergic receptor, nicotinic, alpha 5                        | 30%      | 7%       | 4.65  |
| <b>OGFR</b>         | OpioidGrowth factor receptor                                    | 30%      | 4%       | 6.88  |
| <b>PDHA1</b>        | Pyruvate dehydrogenase E1 component alpha subunit, somatic form | 30%      | 3%       | 10.32 |
| <b>ANXA3</b>        | AnnexinA3                                                       | 30%      | 7%       | 4.53  |
| <b>CHRM4</b>        | Cholinergic receptor, muscarinic 4                              | 30%      | 6%       | 5.10  |
| <b>DSG1-EC5</b>     | Desmoglein 1                                                    | 30%      | 6%       | 5.10  |
| <b>CHRM1</b>        | Cholinergic receptor, muscarinic 1                              | 29%      | 6%       | 5.03  |
| <b>FCRLA</b>        | Fc receptor-like and mucin-like 1                               | 29%      | 6%       | 5.03  |

**Supplemental Table 1. Reactivities of patient and control sera on protein microarrays\***

|                       |                                                                           |     |    |       |
|-----------------------|---------------------------------------------------------------------------|-----|----|-------|
| <b>FH</b>             | Fumarate hydratase (Fumarase)                                             | 29% | 3% | 10.06 |
| <b>MLYCD</b>          | Malonyl-CoA decarboxylase                                                 | 29% | 4% | 8.05  |
| <b>PCDH10</b>         | Protocadherin 10 isoform 1 precursor                                      | 28% | 4% | 7.84  |
| <b>CACNG6</b>         | Voltage-dependent calcium channel Gamma6                                  | 28% | 5% | 5.53  |
| <b>CRAT</b>           | Carnitine O-acetyltransferase                                             | 28% | 7% | 3.87  |
| <b>ITGA4</b>          | Integrin alpha 4 precursor                                                | 28% | 6% | 4.84  |
| <b>CACNG2</b>         | Voltage-dependent calcium channel Gamma2                                  | 28% | 7% | 3.82  |
| <b>CD14</b>           | CD14 molecule                                                             | 28% | 4% | 6.36  |
| <b>CD16a, FCGR3A</b>  | Fc fragment of IgG, low affinity IIIa, receptor (CD16a)                   | 28% | 6% | 4.77  |
| <b>CD48</b>           | CD48 molecule                                                             | 28% | 7% | 4.24  |
| <b>CD32, FCGR2B</b>   | Fc fragment of IgG, low affinity IIb, receptor (CD32)                     | 27% | 2% | 12.55 |
| <b>ITGA7</b>          | Homo sapiens mRNA for ITGA7 variant protein, partial cds, clone: hk04261. | 27% | 7% | 4.18  |
| <b>CD4</b>            | CD4 molecule                                                              | 27% | 4% | 6.19  |
| <b>CHRNA10</b>        | Cholinergic receptor, nicotinic, alpha 10                                 | 27% | 6% | 4.64  |
| <b>MAOB</b>           | Amine oxidase (flavin-containing) B                                       | 27% | 5% | 5.30  |
| <b>CDH4</b>           | Cadherin 4, type 1 preproprotein                                          | 27% | 5% | 5.23  |
| <b>DSG1</b>           | Desmoglein 1                                                              | 27% | 7% | 4.07  |
| <b>PANX1</b>          | pannexin 1                                                                | 27% | 7% | 4.07  |
| <b>PCDHB12</b>        | Protocadherin beta 12 precursor                                           | 27% | 6% | 4.57  |
| <b>CD46</b>           | CD46 molecule, complement regulatory protein                              | 26% | 7% | 4.01  |
| <b>JUP</b>            | Junction plakoglobin                                                      | 26% | 5% | 5.15  |
| <b>COL8A1</b>         | Collagen, type VIII, alpha 1                                              | 26% | 5% | 5.08  |
| <b>CHRND</b>          | Cholinergic receptor, nicotinic, delta                                    | 25% | 1% | 17.51 |
| <b>PRODH</b>          | Proline oxidase                                                           | 25% | 6% | 4.38  |
| <b>SLC6A6-V1</b>      | solute carrier family 6 (neurotransmitter)                                | 25% | 5% | 5.00  |
| <b>DSC2</b>           | Desmocollin 2 isoform Dsc2a preproprotein                                 | 25% | 6% | 4.31  |
| <b>TGFBRAP1</b>       | Transforming Growth factor, beta receptor                                 | 25% | 6% | 4.31  |
| <b>CD37</b>           | CD37 molecule                                                             | 25% | 5% | 4.85  |
| <b>CD93</b>           | CD93 molecule                                                             | 25% | 5% | 4.85  |
| <b>CDH8</b>           | Cadherin 8, type 2 preproprotein                                          | 25% | 2% | 11.33 |
| <b>CHRNB1</b>         | Cholinergic receptor, nicotinic, beta 1 subunit                           | 25% | 6% | 4.25  |
| <b>DSG1-EC1</b>       | Desmoglein 1                                                              | 25% | 7% | 3.78  |
| <b>FDXR</b>           | NADPH:adrenodoxin oxidoreductase                                          | 25% | 6% | 4.25  |
| <b>SOD3</b>           | superoxide dismutase 3, extracellular                                     | 25% | 5% | 4.85  |
| <b>CD66c, CEACAM6</b> | Carcinoembryonic antigen-related cell adhesion molecule 6                 | 24% | 6% | 4.18  |
| <b>CTNNA3-V2</b>      | Catenin, alpha 3                                                          | 24% | 6% | 4.18  |
| <b>HLA-DQB2</b>       | Major histocompatibility complex, class II, DQ beta 2                     | 24% | 5% | 4.78  |
| <b>NDUFA13</b>        | NADH dehydrogenase [ubiquinone] 1 alpha subcomplex subunit 13             | 24% | 6% | 4.18  |
| <b>CD3E</b>           | CD3e molecule, epsilon (CD3-TCR complex)                                  | 24% | 5% | 4.70  |
| <b>CD40</b>           | CD40 molecule, TNF receptor superfamily member 5                          | 24% | 6% | 4.12  |
| <b>CHRNA1-V1</b>      | Cholinergic receptor, nicotinic, alpha 1 isoform b                        | 24% | 6% | 4.12  |
| <b>NMNAT2</b>         | Nicotinamide nucleotide adenyltransferase 2                               | 24% | 6% | 4.12  |
| <b>PKD4</b>           | Pyruvate dehydrogenase [lipoamide] kinase isozyme 4                       | 24% | 4% | 6.59  |
| <b>ATP2C1-V2</b>      | ATPase, Ca <sup>++</sup> transporting, type 2C, member 1                  | 23% | 7% | 3.24  |
| <b>HLA-E</b>          | Major histocompatibility complex, class I, E                              | 23% | 2% | 10.80 |
| <b>ME3</b>            | NADP-dependent malic enzyme                                               | 23% | 8% | 2.95  |
| <b>FGR</b>            | Gardner-Rasheed feline sarcoma viral (v-fgr) oncogene homolog             | 23% | 6% | 3.99  |
| <b>SOD2</b>           | Superoxide dismutase [Mn]                                                 | 23% | 2% | 10.63 |
| <b>ALDH4A1</b>        | Delta-1-pyrroline-5-carboxylate dehydrogenase                             | 23% | 5% | 4.48  |
| <b>FRS2</b>           | Fibroblast Growth factor receptor substrate 2-                            | 23% | 3% | 7.84  |
| <b>DSG3-EC3</b>       | Desmoglein 3                                                              | 22% | 6% | 3.86  |
| <b>HLA-E</b>          | Major histocompatibility complex, class I, E                              | 22% | 4% | 5.14  |
| <b>CHRNA5</b>         | Cholinergic receptor, nicotinic, alpha 5                                  | 22% | 6% | 3.79  |
| <b>NDUFS6</b>         | NADH-ubiquinone oxidoreductase 13 kDa-A subunit                           | 22% | 5% | 4.33  |

**Supplemental Table 1. Reactivities of patient and control sera on protein microarrays\***

|                      |                                                                                            |     |    |       |
|----------------------|--------------------------------------------------------------------------------------------|-----|----|-------|
| <b>CD63</b>          | CD63 molecule                                                                              | 22% | 3% | 7.45  |
| <b>CHRNA2</b>        | Cholinergic receptor, nicotinic, alpha 2                                                   | 22% | 5% | 4.26  |
| <b>FLT3</b>          | Fms-related tyrosine kinase 3                                                              | 22% | 4% | 4.97  |
| <b>CD79</b>          | CD79a molecule, immunoglobulin-associated alpha                                            | 21% | 5% | 4.18  |
| <b>CHRNB4-V1</b>     | Cholinergic receptor, nicotinic, beta 4                                                    | 21% | 4% | 5.85  |
| <b>ETFB-V2</b>       | Electron transfer flavoprotein beta-subunit (Beta-ETF), isoform 1                          | 21% | 3% | 7.32  |
| <b>CD64A, FCGR1A</b> | Fc fragment of IgG, high affinity Ia, receptor (CD64)                                      | 20% | 5% | 4.03  |
| <b>CDH3</b>          | Cadherin 3, type 1 preproprotein                                                           | 20% | 5% | 4.03  |
| <b>CHRM4</b>         | Cholinergic receptor, muscarinic 4                                                         | 20% | 4% | 4.70  |
| <b>COL23A1</b>       | Collagen, type XXIII, alpha 1                                                              | 20% | 4% | 4.70  |
| <b>COL25A1</b>       | Collagen, type XXV, alpha 1                                                                | 20% | 4% | 5.65  |
| <b>NDUFA9</b>        | NADH-ubiquinone oxidoreductase 39 kDa subunit                                              | 20% | 3% | 7.06  |
| <b>ORAI1</b>         | Calcium release                                                                            | 20% | 5% | 4.03  |
| <b>TIMM44</b>        | Import inner membrane translocase subunit TIM44                                            | 20% | 4% | 5.65  |
| <b>CCKBR</b>         | Cholecystokinin B receptor                                                                 | 20% | 4% | 4.62  |
| <b>CD33</b>          | CD33 molecule                                                                              | 20% | 1% | 27.70 |
| <b>CD36</b>          | CD36 molecule (thrombospondin receptor)                                                    | 20% | 5% | 3.96  |
| <b>CD42B, GP1BA</b>  | Glycoprotein Ib (platelet), alpha polypeptide                                              | 20% | 1% | 27.70 |
| <b>CHRNB3</b>        | Cholinergic receptor, nicotinic, beta                                                      | 20% | 3% | 6.93  |
| <b>CTNBL1</b>        | Beta catenin-like1                                                                         | 20% | 6% | 3.46  |
| <b>ITGA8</b>         | Integrin, alpha 8                                                                          | 20% | 5% | 3.96  |
| <b>ANXA9</b>         | AnnexinA9                                                                                  | 20% | 6% | 3.40  |
| <b>CHRNE</b>         | Cholinergic receptor, nicotinic, epsilon                                                   | 20% | 5% | 3.88  |
| <b>DSG3-EC5</b>      | Desmoglein 3                                                                               | 20% | 5% | 3.88  |
| <b>EPS8L2</b>        | EpidermalGrowth factor receptor pathway substrate 8-related protein 2                      | 20% | 6% | 3.40  |
| <b>CD81</b>          | CD81 molecule                                                                              | 19% | 4% | 5.33  |
| <b>ETFA</b>          | Electron transfer flavoprotein alpha-subunit                                               | 19% | 4% | 4.44  |
| <b>CYB5B</b>         | Cytochrome b5 outer mitochondrial membrane isoform precursor                               | 19% | 1% | 13.07 |
| <b>FCGR2B</b>        | Fc fragment of IgG, low affinity IIb, receptor                                             | 19% | 5% | 3.73  |
| <b>PCDHB5</b>        | Protocadherin beta 5 precursor                                                             | 19% | 4% | 5.23  |
| <b>SYNJ2BP</b>       | Synaptojanin 2 binding protein                                                             | 19% | 3% | 6.53  |
| <b>ABAT</b>          | 4-aminobutyrate aminotransferase                                                           | 19% | 4% | 4.27  |
| <b>CHRNB2</b>        | Cholinergic receptor, nicotinic, beta 2                                                    | 19% | 7% | 2.85  |
| <b>CHRNE</b>         | Cholinergic receptor, nicotinic, epsilon                                                   | 19% | 5% | 3.66  |
| <b>DSG1</b>          | Desmoglein 1                                                                               | 19% | 7% | 2.85  |
| <b>GK2</b>           | Glycerol kinase, testis specific 2                                                         | 19% | 5% | 3.66  |
| <b>MET-V1</b>        | Homo sapiens mRNA for met proto-oncogene precursor variant protein.                        | 19% | 6% | 3.20  |
| <b>NDUFV3-V2</b>     | NADH-ubiquinone oxidoreductase 9 kDa subunit                                               | 19% | 4% | 4.27  |
| <b>AKAP10</b>        | Protein kinase A Anchoring protein 10                                                      | 18% | 4% | 5.02  |
| <b>ATP2C1-V3</b>     | ATPase, Ca <sup>++</sup> transporting, type 2C, membe                                      | 18% | 4% | 5.02  |
| <b>CHRNA4-V1</b>     | Cholinergic receptor, nicotinic, alpha 4 subunit                                           | 18% | 3% | 6.27  |
| <b>CD100, SEMA4D</b> | Sema domain, Ig domain, transmembrane domain and short cytoplasmic domain, (semaphorin) 4D | 18% | 4% | 4.91  |
| <b>CD34</b>          | CD34 molecule                                                                              | 18% | 6% | 3.07  |
| <b>CD69</b>          | CD69 molecule                                                                              | 18% | 5% | 3.51  |
| <b>CHRNA9</b>        | Cholinergic receptor, nicotinic, alpha 9                                                   | 18% | 4% | 4.09  |
| <b>CHRNB4-V2</b>     | Cholinergic receptor, nicotinic, beta 4                                                    | 18% | 5% | 3.51  |
| <b>CPT1B</b>         | Carnitine O-palmitoyltransferase I, mitochondrial muscle isoform                           | 18% | 5% | 3.51  |
| <b>DSC1</b>          | Desmocollin 1 isoform Dsc1a preproprotein                                                  | 18% | 7% | 2.73  |
| <b>EPS15L1</b>       | EpidermalGrowth factor receptor pathway substrate 15-like 1                                | 18% | 6% | 3.07  |
| <b>HLA-C_V2</b>      | Major histocompatibility complex, class I, C                                               | 18% | 4% | 4.91  |
| <b>ITGB1</b>         | Integrin beta 1 isoform 1C                                                                 | 18% | 3% | 6.14  |
| <b>ME2</b>           | NAD-dependent malic enzyme                                                                 | 18% | 6% | 3.07  |
| <b>NDUFV3</b>        | NADH-ubiquinone oxidoreductase 9 kDa subunit                                               | 18% | 4% | 4.91  |
| <b>PGR</b>           | Progesterone receptor                                                                      | 18% | 6% | 3.07  |

**Supplemental Table 1. Reactivities of patient and control sera on protein microarrays\***

|                       |                                                                                            |     |    |       |
|-----------------------|--------------------------------------------------------------------------------------------|-----|----|-------|
| <b>CHRN1</b>          | Cholinergic receptor, nicotinic, beta 1 subunit                                            | 17% | 5% | 3.44  |
| <b>CTNNB1</b>         | Catenin, beta interacting protein 1                                                        | 17% | 4% | 4.01  |
| <b>ACTA1</b>          | Actin, Alpha 1, skeletal muscle                                                            | 17% | 6% | 2.94  |
| <b>CTNNAL1</b>        | Catenin, alpha-like 1                                                                      | 17% | 4% | 4.70  |
| <b>NDUFB10</b>        | NADH-ubiquinone oxidoreductase PDSW subunit                                                | 17% | 2% | 7.84  |
| <b>PCDHB15</b>        | Protocadherin beta 15 precursor                                                            | 17% | 4% | 3.92  |
| <b>DSG1</b>           | Desmoglein 1                                                                               | 17% | 5% | 3.36  |
| <b>BDKRB2</b>         | Bradykinin receptor B2                                                                     | 17% | 4% | 3.83  |
| <b>CD19</b>           | CD19 molecule                                                                              | 17% | 5% | 3.29  |
| <b>CD3E</b>           | CD3e molecule, epsilon (CD3-TCR complex)                                                   | 17% | 4% | 3.83  |
| <b>CD40_V2</b>        | CD40 molecule, TNF receptor superfamily member 5                                           | 17% | 6% | 2.88  |
| <b>CDH9</b>           | Cadherin 9, type 2 preproprotein                                                           | 17% | 1% | 11.50 |
| <b>DSG1_EC3</b>       | Desmoglein 1                                                                               | 17% | 6% | 2.88  |
| <b>DSG3_EC1</b>       | Desmoglein 3                                                                               | 17% | 5% | 3.29  |
| <b>CD75, ST6GAL1</b>  | ST6 beta-galactosamide alpha-2,6-sialyltransferase 1                                       | 16% | 5% | 3.21  |
| <b>CDH17</b>          | Cadherin 17 precursor                                                                      | 16% | 3% | 5.62  |
| <b>NDUFB4</b>         | NADH-ubiquinone oxidoreductase B15 subunit                                                 | 16% | 2% | 7.49  |
| <b>NR3C1</b>          | Nuclear receptor subfamily 3, group C, member 1                                            | 16% | 5% | 3.21  |
| <b>PMPCA</b>          | Peptidase (mitochondrial processing) alpha                                                 | 16% | 4% | 3.75  |
| <b>SLC38A1</b>        | Solute carrier family 38, member 1                                                         | 16% | 4% | 3.75  |
| <b>TIMM13</b>         | Mitochondrial import inner membrane translocase subunit TIM13 B                            | 16% | 4% | 4.50  |
| <b>ATP2A2-V1</b>      | ATPase, Ca <sup>++</sup> transporting, cardiac muscle, slow twitch 2                       | 16% | 6% | 2.74  |
| <b>CACNA2D1</b>       | CalciumChannel, voltage-dependent, alpha                                                   | 16% | 3% | 5.49  |
| <b>CD3G</b>           | CD3g molecule, Gamma (CD3-TCR complex)                                                     | 16% | 2% | 7.32  |
| <b>FGFR1</b>          | FibroblastGrowth factor receptor 1                                                         | 16% | 4% | 3.66  |
| <b>GLUD2</b>          | Glutamate dehydrogenase 2                                                                  | 16% | 6% | 2.74  |
| <b>CD74</b>           | CD74 molecule, major histocompatibility complex, class II invariant chain                  | 16% | 6% | 2.68  |
| <b>COL6A2</b>         | Collagen, type VI, alpha 2                                                                 | 16% | 2% | 7.14  |
| <b>GPAM</b>           | Glycerol-3-phosphate acyltransferase                                                       | 16% | 6% | 2.68  |
| <b>HADH</b>           | Short chain 3-hydroxyacyl-CoA dehydrogenase                                                | 16% | 3% | 5.36  |
| <b>HMGCL</b>          | Hydroxymethylglutaryl-CoA lyase                                                            | 16% | 5% | 3.06  |
| <b>PDGFRA</b>         | Platelet-derivedGrowth factor receptor alpha                                               | 16% | 5% | 3.06  |
| <b>AR</b>             | Androgen receptor                                                                          | 15% | 4% | 4.18  |
| <b>CD98, SLC7A5</b>   | Solute carrier family 7 (cationic amino acid transporter, y <sup>+</sup> system), member 5 | 15% | 5% | 2.99  |
| <b>COL21A1</b>        | Collagen, type XXI, alpha 1                                                                | 15% | 2% | 6.97  |
| <b>GRIA3</b>          | Glutamate receptor, ionotropic, AMPA3                                                      | 15% | 4% | 3.48  |
| <b>CD98, SLC3A2</b>   | Solute carrier family 3 (activators of dibasic and neutral amino acid transport), member 2 | 15% | 6% | 2.55  |
| <b>COL9A1</b>         | Collagen, type IX, alpha 2                                                                 | 15% | 4% | 3.40  |
| <b>COX10</b>          | Protoheme IX farnesyltransferase                                                           | 15% | 2% | 6.80  |
| <b>CTNNA1</b>         | Catenin, alpha 1                                                                           | 15% | 5% | 2.91  |
| <b>HBE1</b>           | Hemoglobin, epsilon 1                                                                      | 15% | 4% | 3.40  |
| <b>PCDHB9</b>         | Protocadherin beta 9 precursor                                                             | 15% | 5% | 2.91  |
| <b>TMLHE</b>          | Trimethyllysine dioxygenase                                                                | 15% | 3% | 5.10  |
| <b>CD11C, ITGAX</b>   | Integrin, alpha X (complement component 3 receptor 4 subunit)                              | 14% | 1% | 9.93  |
| <b>CD20, MS4A1</b>    | Membrane-spanning 4-domains, subfamily A, member 1                                         | 14% | 7% | 2.21  |
| <b>DSG1-EC2</b>       | Desmoglein 1                                                                               | 14% | 5% | 2.84  |
| <b>FECH</b>           | Ferrochelatase                                                                             | 14% | 3% | 4.97  |
| <b>HK2</b>            | Hexokinase, type II                                                                        | 14% | 7% | 2.21  |
| <b>MTX1</b>           | Metaxin 1                                                                                  | 14% | 2% | 6.62  |
| <b>CD14</b>           | CD14 molecule                                                                              | 14% | 6% | 2.42  |
| <b>CD4</b>            | CD4 molecule                                                                               | 14% | 6% | 2.42  |
| <b>CD66e, CEACAM5</b> | Carcinoembryonic antigen-related cell adhesion molecule 5                                  | 14% | 5% | 2.76  |
| <b>DSC2</b>           | Desmocollin 2 isoform Dsc2a preproprotein                                                  | 14% | 6% | 2.42  |
| <b>FCRLB</b>          | Fc receptor-like B                                                                         | 14% | 4% | 3.22  |

**Supplemental Table 1. Reactivities of patient and control sera on protein microarrays\***

|                         |                                                                                                       |     |    |       |
|-------------------------|-------------------------------------------------------------------------------------------------------|-----|----|-------|
| <b>MUPCDH</b>           | Mucin and cadherin-like isoform 1                                                                     | 14% | 6% | 2.42  |
| <b>NDUFA2</b>           | NADH-ubiquinone oxidoreductase B8 subunit                                                             | 14% | 3% | 4.84  |
| <b>SDHA</b>             | Succinate dehydrogenase (ubiquinone) flavoprotein subunit                                             | 14% | 6% | 2.42  |
| <b>SLC7A8</b>           | solute carrier family 7 (cationic amino acid                                                          | 14% | 4% | 3.87  |
| <b>CKMT1B</b>           | Creatine kinase                                                                                       | 14% | 3% | 4.70  |
| <b>COX17</b>            | Cytochrome c oxidase copper chaperone                                                                 | 14% | 3% | 4.70  |
| <b>NDUFA12</b>          | NADH dehydrogenase [ubiquinone] 1 alpha subcomplex subunit 12;                                        | 14% | 7% | 2.09  |
| <b>OGFRL1</b>           | OpioidGrowth factor receptor-like 1                                                                   | 14% | 4% | 3.76  |
| <b>ANXA9</b>            | AnnexinA9                                                                                             | 13% | 4% | 3.05  |
| <b>CHRM1</b>            | Cholinergic receptor, muscarinic 1                                                                    | 13% | 3% | 4.57  |
| <b>COL9A1</b>           | Collagen, type IX, alpha 1                                                                            | 13% | 6% | 2.29  |
| <b>CPT1A</b>            | Carnitine O-palmitoyltransferase I, mitochondrial liver isoform                                       | 13% | 4% | 3.05  |
| <b>HLA-A</b>            | Major histocompatibility complex, class I, A                                                          | 13% | 6% | 2.29  |
| <b>HLA-DPB1</b>         | Major histocompatibility complex, class II, DP beta 1                                                 | 13% | 7% | 2.03  |
| <b>ATP2A2-V1</b>        | ATPase, Ca <sup>++</sup> transporting, cardiac muscle, slow twitch 2                                  | 13% | 6% | 2.22  |
| <b>BDKRB1</b>           | Bradykinin receptor B1                                                                                | 13% | 7% | 1.97  |
| <b>CD3D</b>             | CD3d molecule, delta (CD3-TCR complex)                                                                | 13% | 5% | 2.54  |
| <b>CD42a, GP9, GPIX</b> | Glycoprotein IX (platelet)                                                                            | 13% | 4% | 3.55  |
| <b>DSG3_S2</b>          | Desmoglein 3                                                                                          | 13% | 4% | 2.96  |
| <b>TIMM9</b>            | Mitochondrial import inner membrane translocase subunit TIM9 A                                        | 13% | 7% | 1.97  |
| <b>CACNB4</b>           | CalciumChannel, voltage-dependent, beta 4                                                             | 13% | 4% | 2.88  |
| <b>CHRNA2</b>           | Cholinergic receptor, nicotinic, alpha 2                                                              | 13% | 5% | 2.46  |
| <b>CHRNA7</b>           | Cholinergic receptor, nicotinic, alpha 7                                                              | 13% | 3% | 4.31  |
| <b>COX5B</b>            | Cytochrome c oxidase polypeptide Vb                                                                   | 13% | 4% | 2.88  |
| <b>DSG2</b>             | Desmoglein 2                                                                                          | 13% | 5% | 2.46  |
| <b>PKD1</b>             | Pyruvate dehydrogenase [lipoamide]] kinase isozyme 1                                                  | 13% | 4% | 3.45  |
| <b>PIGR</b>             | Polymeric immunoglobulin receptor                                                                     | 13% | 3% | 4.31  |
| <b>SDHD</b>             | Succinate dehydrogenase (ubiquinone) cytochrome B small subunit                                       | 13% | 2% | 5.75  |
| <b>SLC36A4</b>          | Solute carrier family 36, member 4                                                                    | 13% | 1% | 17.25 |
| <b>ATP2A2-V2</b>        | ATPase, Ca <sup>++</sup> transporting, cardiac muscle, slow twitch 2                                  | 12% | 4% | 2.79  |
| <b>CD99</b>             | CD99 molecule                                                                                         | 12% | 4% | 3.35  |
| <b>NDUFA4</b>           | NADH-ubiquinone oxidoreductase MLRQ subunit                                                           | 12% | 3% | 4.18  |
| <b>ABCB7</b>            | ATP-binding cassette transporter 7                                                                    | 12% | 5% | 2.31  |
| <b>CD10, MME</b>        | Membrane metallo-endopeptidase                                                                        | 12% | 3% | 4.05  |
| <b>CD11A, ITGAL-2</b>   | Integrin, alpha L (antigen CD11A (p180), lymphocyte function-associated antigen 1; alpha polypeptide) | 12% | 1% | 8.10  |
| <b>CD71, TFRC</b>       | Transferrin receptor (p90, CD71)                                                                      | 12% | 3% | 4.05  |
| <b>CD8B</b>             | CD8b molecule                                                                                         | 12% | 7% | 1.80  |
| <b>CD96</b>             | CD96 molecule                                                                                         | 12% | 6% | 2.03  |
| <b>COL20A1</b>          | Collagen, type XX, alpha 1                                                                            | 12% | 4% | 3.24  |
| <b>FCRL5</b>            | Fc receptor-like 5                                                                                    | 12% | 5% | 2.31  |
| <b>HLA-DRB1</b>         | Major histocompatibility complex, class II, DR beta 1                                                 | 12% | 5% | 2.31  |
| <b>ITGA5</b>            | Integrin alpha 5 precursor                                                                            | 12% | 4% | 2.70  |
| <b>MAOA</b>             | Amine oxidase (flavin-containing) A                                                                   | 12% | 4% | 2.70  |
| <b>NDUFS1</b>           | NADH-ubiquinone oxidoreductase 75 kDa subunit                                                         | 12% | 1% | 16.20 |
| <b>PCDH8</b>            | Protocadherin 8 isoform 1 precursor                                                                   | 12% | 4% | 3.24  |
| <b>PCDHB10</b>          | Protocadherin beta 10 precursor                                                                       | 12% | 6% | 2.03  |
| <b>SUOX</b>             | Sulfite oxidase                                                                                       | 12% | 5% | 2.31  |
| <b>CD13, ANPEP</b>      | Alanyl (membrane) aminopeptidase                                                                      | 11% | 4% | 3.14  |
| <b>MCCC2</b>            | Methylcrotonyl-CoA carboxylase beta chain                                                             | 11% | 4% | 3.14  |
| <b>ATP2A2-V2</b>        | ATPase, Ca <sup>++</sup> transporting, cardiac muscle, slow twitch 2                                  | 11% | 5% | 2.17  |
| <b>CD207</b>            | CD207 molecule, langerin                                                                              | 11% | 7% | 1.68  |
| <b>COL3A1</b>           | Collagen, type III, alpha 1                                                                           | 11% | 4% | 2.53  |
| <b>NDUFB2</b>           | NADH-ubiquinone oxidoreductase AGGG subunit                                                           | 11% | 5% | 2.17  |
| <b>SLC16A10</b>         | Solute carrier family 16, member 10                                                                   | 11% | 1% | 7.58  |

**Supplemental Table 1. Reactivities of patient and control sera on protein microarrays\***

|                       |                                                                                                  |     |    |       |
|-----------------------|--------------------------------------------------------------------------------------------------|-----|----|-------|
| <b>CD1D</b>           | CD1d molecule                                                                                    | 11% | 4% | 2.93  |
| <b>CD2</b>            | CD2 molecule                                                                                     | 11% | 6% | 1.83  |
| <b>COX11</b>          | Cytochrome c oxidase assembly homolog                                                            | 11% | 4% | 2.93  |
| <b>DHODH</b>          | Dihydroorotate dehydrogenase                                                                     | 11% | 4% | 2.93  |
| <b>GK-V1</b>          | Glycerol kinase, testis specific 1                                                               | 11% | 4% | 2.93  |
| <b>CACNG7</b>         | Voltage-dependent calcium channel gamma 7                                                        | 10% | 3% | 3.53  |
| <b>CD36</b>           | CD36 molecule (thrombospondin receptor)                                                          | 10% | 4% | 2.35  |
| <b>CDH13</b>          | Cadherin 13 preproprotein                                                                        | 10% | 3% | 3.53  |
| <b>CDS2</b>           | Phosphatidate cytidyltransferase 2                                                               | 10% | 4% | 2.82  |
| <b>DSG3_EC2</b>       | Desmoglein 3                                                                                     | 10% | 7% | 1.57  |
| <b>EPS8L1-V1</b>      | EPS8-like 1, isoform a                                                                           | 10% | 4% | 2.35  |
| <b>GOT1</b>           | Glutamic-oxaloacetic transaminase 1                                                              | 10% | 6% | 1.76  |
| <b>HLA-B</b>          | Major histocompatibility complex, class I, B                                                     | 10% | 4% | 2.35  |
| <b>ITGB2</b>          | Integrin, beta 2 precursor                                                                       | 10% | 7% | 1.57  |
| <b>UCP2</b>           | Mitochondrial uncoupling protein 2 (UCP 2) (UCPH)                                                | 10% | 5% | 2.02  |
| <b>APLNR</b>          | Apelin receptor                                                                                  | 10% | 4% | 2.72  |
| <b>CD50, ICAM3</b>    | Intercellular adhesion molecule 3                                                                | 10% | 4% | 2.72  |
| <b>GOT2</b>           | Glutamic-oxaloacetic transaminase 2                                                              | 10% | 6% | 1.70  |
| <b>SLC25A5</b>        | solute carrier family 25 (mitochondrial carrier; citrate transporter), member 5                  | 10% | 4% | 2.27  |
| <b>CD18, ITGB2</b>    | integrin, beta 2 (complement component 3 receptor 3 and 4 subunit)                               | 9%  | 6% | 1.63  |
| <b>CD1B</b>           | CD1b molecule                                                                                    | 9%  | 1% | 13.07 |
| <b>COL1A2</b>         | Collagen, type I, alpha 2                                                                        | 9%  | 5% | 1.87  |
| <b>DSG3_S1</b>        | Desmoglein 3                                                                                     | 9%  | 4% | 2.18  |
| <b>DSG3</b>           | Desmoglein 3                                                                                     | 9%  | 6% | 1.63  |
| <b>DSG4</b>           | Desmoglein 4 isoform 2                                                                           | 9%  | 5% | 1.87  |
| <b>F2RL1</b>          | Coagulation factor II (thrombin) receptor-like 1                                                 | 9%  | 4% | 2.18  |
| <b>GRIN2A</b>         | Glutamate receptor, ionotropic, N-methyl D-aspartate 2A                                          | 9%  | 4% | 2.18  |
| <b>ITGB6</b>          | Integrin, beta 6                                                                                 | 9%  | 3% | 3.27  |
| <b>MTRR-V1</b>        | Methionine synthase reductase                                                                    | 9%  | 4% | 2.18  |
| <b>NDUFV1</b>         | NADH-ubiquinone oxidoreductase 51 kDa subunit                                                    | 9%  | 1% | 6.53  |
| <b>UPK3B</b>          | Uroplakin 3B isoform a                                                                           | 9%  | 7% | 1.45  |
| <b>CD92, SLC44A1</b>  | Solute carrier family 44, member 1                                                               | 9%  | 2% | 4.18  |
| <b>CRHR1</b>          | Corticotropin releasing hormone receptor 1                                                       | 9%  | 3% | 3.14  |
| <b>FACL6</b>          | Acyl-CoA synthetase long-chain family member 6                                                   | 9%  | 2% | 4.18  |
| <b>CACNA1G-S2</b>     | Voltage-dependent calcium channel alpha 1G                                                       | 9%  | 4% | 2.40  |
| <b>CD69</b>           | CD69 molecule                                                                                    | 9%  | 1% | 6.01  |
| <b>CTNNA2</b>         | Catenin, alpha 2                                                                                 | 9%  | 4% | 2.00  |
| <b>FGFRL1</b>         | Fibroblast growth factor receptor-like 1                                                         | 9%  | 4% | 2.00  |
| <b>MTRR-V2</b>        | Methionine synthase reductase                                                                    | 9%  | 5% | 1.72  |
| <b>PKP4</b>           | Plakophilin 4 isoform a                                                                          | 9%  | 4% | 2.00  |
| <b>C1QBP</b>          | Complement component 1, q subcomponent binding protein                                           | 8%  | 4% | 2.30  |
| <b>CD5</b>            | CD5 molecule                                                                                     | 8%  | 2% | 3.83  |
| <b>CD57, B3GAT1</b>   | Beta-1,3-glucuronyltransferase 1 (glucuronosyltransferase P)                                     | 8%  | 4% | 2.30  |
| <b>DSG1</b>           | Desmoglein 1                                                                                     | 8%  | 2% | 3.83  |
| <b>ORAI1</b>          | Calcium release                                                                                  | 8%  | 3% | 2.88  |
| <b>PMPCB</b>          | Mitochondrial processing peptidase beta subunit                                                  | 8%  | 4% | 1.92  |
| <b>SLC25A17</b>       | Solute carrier family 25 (mitochondrial carrier; peroxisomal membrane protein, 34kDa), member 17 | 8%  | 1% | 5.75  |
| <b>CD41, ITGA2B-2</b> | Integrin, alpha 2b (platelet glycoprotein IIb of IIb/IIIa complex, antigen CD41)                 | 8%  | 4% | 1.83  |
| <b>CD66b, CEACAM8</b> | Carcinoembryonic antigen-related cell adhesion molecule 8                                        | 8%  | 5% | 1.57  |
| <b>CHRND</b>          | Cholinergic receptor, nicotinic, delta                                                           | 8%  | 3% | 2.74  |
| <b>COQ3</b>           | Hexaprenyldihydroxybenzoate methyltransferase                                                    | 8%  | 3% | 2.74  |
| <b>ECHS1</b>          | Enoyl-CoA hydratase                                                                              | 8%  | 4% | 2.20  |
| <b>HRH2</b>           | Histamine receptor H2                                                                            | 8%  | 4% | 2.20  |
| <b>HTRA2</b>          | HtrA serine peptidase 2                                                                          | 8%  | 4% | 1.83  |

**Supplemental Table 1. Reactivities of patient and control sera on protein microarrays\***

|                    |                                                                                              |    |    |      |
|--------------------|----------------------------------------------------------------------------------------------|----|----|------|
| <b>NDUFS6</b>      | NADH-ubiquinone oxidoreductase 13 kDa-A subunit                                              | 8% | 4% | 2.20 |
| <b>UCRC</b>        | Ubiquinol-cytochrome c reductase, complex III subunit X                                      | 8% | 5% | 1.57 |
| <b>CACNA1G-S3</b>  | Voltage-dependent Calcium Channel alpha 1G                                                   | 8% | 6% | 1.31 |
| <b>CDH11</b>       | Cadherin 11, type 2 preproprotein                                                            | 8% | 4% | 1.74 |
| <b>NDUFA7</b>      | NADH-ubiquinone oxidoreductase subunit B14.5a                                                | 8% | 4% | 2.09 |
| <b>NGFRAP1</b>     | Nerve Growth factor receptor (TNFRSF16)                                                      | 8% | 4% | 2.09 |
| <b>UQCRQ</b>       | Ubiquinol-cytochrome c reductase, complex III subunit VII                                    | 8% | 5% | 1.49 |
| <b>CD52</b>        | CD52 molecule                                                                                | 7% | 1% | 4.97 |
| <b>CYCS</b>        | Cytochrome c                                                                                 | 7% | 4% | 1.66 |
| <b>DSC3</b>        | Desmocollin 3 isoform Dsc3a preproprotein                                                    | 7% | 9% | 0.83 |
| <b>EPS8L3</b>      | Epidermal Growth factor receptor pathway substrate 8-related protein 3                       | 7% | 4% | 1.99 |
| <b>MIPEP</b>       | Mitochondrial intermediate peptidase                                                         | 7% | 1% | 9.93 |
| <b>NDUFV2</b>      | NADH-ubiquinone oxidoreductase 24 kDa subunit                                                | 7% | 4% | 1.99 |
| <b>SLC9A6</b>      | Sodium/hydrogen exchanger 6 (Na <sup>+</sup> /H <sup>+</sup> exchanger 6) (NHE-6)            | 7% | 4% | 1.99 |
| <b>BAD</b>         | Bcl2-antagonist of cell death (BAD)                                                          | 7% | 4% | 1.88 |
| <b>CACNA1S-S3</b>  | Calcium Channel, voltage-dependent, L type,                                                  | 7% | 4% | 1.88 |
| <b>DSG2</b>        | Desmoglein 2                                                                                 | 7% | 7% | 1.05 |
| <b>DSG3_EC5</b>    | Desmoglein 3                                                                                 | 7% | 4% | 1.57 |
| <b>IGF1R</b>       | Insulin-like Growth factor 1 receptor precursor                                              | 7% | 1% | 4.70 |
| <b>PIIF</b>        | Peptidyl-prolyl cis-trans isomerase                                                          | 7% | 8% | 0.86 |
| <b>ACTG2</b>       | Actin, Gamma 2, smooth muscle, enteric                                                       | 6% | 4% | 1.48 |
| <b>CHRNA2</b>      | Cholinergic receptor, nicotinic, alpha 2                                                     | 6% | 4% | 1.78 |
| <b>DSG1</b>        | Desmoglein 1                                                                                 | 6% | 5% | 1.27 |
| <b>FLT3LG</b>      | Fms-related tyrosine kinase 3 ligand                                                         | 6% | 4% | 1.48 |
| <b>MTX2-V1</b>     | Metaxin 2                                                                                    | 6% | 4% | 1.48 |
| <b>NDUFV3-V1</b>   | NADH-ubiquinone oxidoreductase 9 kDa subunit                                                 | 6% | 5% | 1.27 |
| <b>AGTR1</b>       | Angiotensin II receptor, type 1                                                              | 6% | 4% | 1.39 |
| <b>CD29, ITGB2</b> | Integrin, beta 1 (fibronectin receptor, beta polypeptide, antigen CD29 includes MDF2, MSK12) | 6% | 2% | 2.79 |
| <b>CD3G</b>        | CD3g molecule, Gamma (CD3-TCR complex)                                                       | 6% | 4% | 1.39 |
| <b>CHRNA10</b>     | Cholinergic receptor, nicotinic, alpha 10                                                    | 6% | 3% | 2.09 |
| <b>FCGRT</b>       | Fc Fragment of IgG, receptor, transporter,                                                   | 6% | 5% | 1.19 |
| <b>FPGS</b>        | Folypolyglutamate synthase                                                                   | 6% | 2% | 2.79 |
| <b>NDUFA1</b>      | NADH-ubiquinone oxidoreductase MWFE subunit                                                  | 6% | 3% | 2.09 |
| <b>PTH1R</b>       | Parathyroid hormone 1 receptor                                                               | 6% | 3% | 2.09 |
| <b>SCP3</b>        | Synaptonemal complex protein 3                                                               | 6% | 4% | 1.39 |
| <b>CD47</b>        | CD47 molecule                                                                                | 6% | 5% | 1.12 |
| <b>CD8A</b>        | CD8a molecule                                                                                | 6% | 6% | 0.98 |
| <b>CD97</b>        | CD97 molecule                                                                                | 6% | 7% | 0.87 |
| <b>CKMT2</b>       | Creatine kinase                                                                              | 6% | 2% | 2.61 |
| <b>TIMM22</b>      | Mitochondrial import inner membrane translocase subunit TIM22                                | 6% | 1% | 3.92 |
| <b>UQCRFS1</b>     | Ubiquinol-cytochrome C reductase iron-sulfur subunit                                         | 6% | 4% | 1.31 |
| <b>CD27</b>        | CD27 molecule                                                                                | 5% | 5% | 1.05 |
| <b>CD58</b>        | CD58 molecule                                                                                | 5% | 4% | 1.46 |
| <b>CD9</b>         | CD9 molecule                                                                                 | 5% | 4% | 1.46 |
| <b>DSC3</b>        | Desmocollin 3 isoform Dsc3a preproprotein                                                    | 5% | 6% | 0.91 |
| <b>GCDH-V1</b>     | Glutaryl-CoA dehydrogenase                                                                   | 5% | 4% | 1.22 |
| <b>HSPD1</b>       | Heat shock 60kDa protein 1                                                                   | 5% | 4% | 1.46 |
| <b>ITGB1BP2</b>    | Integrin beta 1 binding protein 2                                                            | 5% | 4% | 1.46 |
| <b>TSPO</b>        | translocator protein                                                                         | 5% | 2% | 2.44 |
| <b>UQCRC2</b>      | Ubiquinol-cytochrome C reductase complex core protein 2                                      | 5% | 5% | 1.05 |
| <b>ANXA4</b>       | Annexin IV                                                                                   | 5% | 6% | 0.85 |
| <b>CD1A</b>        | CD1a molecule                                                                                | 5% | 7% | 0.76 |
| <b>CD28</b>        | CD28 molecule                                                                                | 5% | 6% | 0.85 |
| <b>CD55</b>        | CD55 molecule, decay accelerating factor for complement (Cromer blood Group)                 | 5% | 4% | 1.13 |

**Supplemental Table 1. Reactivities of patient and control sera on protein microarrays\***

|                      |                                                                                   |    |    |      |
|----------------------|-----------------------------------------------------------------------------------|----|----|------|
| <b>CD66d,CEACAM3</b> | Carcinoembryonic antigen-related cell adhesion molecule 3                         | 5% | 4% | 1.13 |
| <b>CDH16</b>         | Cadherin 16 precursor                                                             | 5% | 2% | 2.27 |
| <b>CDH24</b>         | Cadherin                                                                          | 5% | 4% | 1.36 |
| <b>CHRM2</b>         | Cholinergic receptor, muscarinic 2                                                | 5% | 6% | 0.85 |
| <b>COL5A1</b>        | Collagen, type V, alpha 1                                                         | 5% | 4% | 1.36 |
| <b>COLQ</b>          | Collagen-like tail subunit                                                        | 5% | 4% | 1.13 |
| <b>FCRL4</b>         | Fc receptor-like 4                                                                | 5% | 4% | 1.36 |
| <b>NDUFA13</b>       | NADH dehydrogenase [ubiquinone] 1 alpha subcomplex subunit 13                     | 5% | 5% | 0.97 |
| <b>NDUFV1-V1</b>     | NADH-ubiquinone oxidoreductase 51 kDa subunit                                     | 5% | 1% | 3.40 |
| <b>SLC25A15</b>      | Solute carrier family 25 (aspartate/glutamate carrier), member 15                 | 5% | 3% | 1.70 |
| <b>SLC25A19</b>      | Solute carrier family 25, member 19                                               | 5% | 4% | 1.13 |
| <b>SLC25A39</b>      | Solute carrier family 25, member 39                                               | 5% | 6% | 0.85 |
| <b>SLC36A2</b>       | Solute carrier family 36, member 2                                                | 5% | 2% | 2.27 |
| <b>TACR1</b>         | Tachykinin receptor 1                                                             | 5% | 4% | 1.13 |
| <b>WARS2</b>         | Tryptophanyl-tRNA synthetase                                                      | 5% | 1% | 6.80 |
| <b>CD19</b>          | CD19 molecule                                                                     | 5% | 1% | 6.27 |
| <b>CD66f, PSG1</b>   | Pregnancy specific beta-1-glycoprotein 1                                          | 5% | 2% | 2.09 |
| <b>HLA-DQA1</b>      | Major histocompatibility complex, class II, DQ alpha 1                            | 5% | 7% | 0.63 |
| <b>ITGB1BP1</b>      | Integrin cytoplasmic domain-associated protein 1                                  | 5% | 3% | 1.57 |
| <b>OXA1L</b>         | Cytochrome oxidase biogenesis protein OXA1                                        | 5% | 5% | 0.90 |
| <b>PCCA</b>          | Propionyl-CoA carboxylase alpha chain                                             | 5% | 7% | 0.70 |
| <b>PCDH20</b>        | Protocadherin 20                                                                  | 5% | 4% | 1.25 |
| <b>SLC25A20</b>      | Solute carrier family 25 (mitochondrial carrier; ornithine transporter) member 20 | 5% | 1% | 6.27 |
| <b>AKAP1</b>         | Protein kinase A Anchoring protein 1                                              | 4% | 4% | 1.15 |
| <b>ANXA8L2</b>       | AnnexinA8L2                                                                       | 4% | 4% | 0.96 |
| <b>BCL2</b>          | Apoptosis regulator Bcl-2                                                         | 4% | 1% | 2.88 |
| <b>CD40</b>          | CD40 molecule, TNF receptor superfamily member 5                                  | 4% | 5% | 0.82 |
| <b>CD79</b>          | CD79b molecule, immunoglobulin-associated beta                                    | 4% | 5% | 0.82 |
| <b>CD83</b>          | CD83 molecule                                                                     | 4% | 6% | 0.72 |
| <b>CD89, FCAR</b>    | Fc fragment of IgA, receptor for                                                  | 4% | 4% | 0.96 |
| <b>CD90, THY1</b>    | Thy-1 cell surface antigen                                                        | 4% | 4% | 0.96 |
| <b>CD94, KLRD1</b>   | Killer cell lectin-like receptor subfamily D, member 1                            | 4% | 4% | 1.15 |
| <b>CHRNA10</b>       | Cholinergic receptor, nicotinic, alpha 10                                         | 4% | 4% | 1.15 |
| <b>COX6A1</b>        | Cytochrome c oxidase polypeptide VIa-liver                                        | 4% | 7% | 0.58 |
| <b>CS</b>            | Citrate synthase                                                                  | 4% | 1% | 2.88 |
| <b>FLT4</b>          | Fms-related tyrosine kinase 4                                                     | 4% | 6% | 0.72 |
| <b>ITGAV</b>         | Integrin alpha-V isoform 1 precursor                                              | 4% | 6% | 0.72 |
| <b>NDUFB1</b>        | NADH-ubiquinone oxidoreductase MNLL subunit                                       | 4% | 5% | 0.82 |
| <b>PCCB</b>          | Propionyl-CoA carboxylase beta chain                                              | 4% | 4% | 0.96 |
| <b>SCP2</b>          | Sterol carrier protein 2                                                          | 4% | 6% | 0.72 |
| <b>TOMM40</b>        | Probable mitochondrial import receptor subunit TOM40 homolog                      | 4% | 2% | 1.92 |
| <b>ACTC1</b>         | Actin, Alpha, cArDiAc muscle 1                                                    | 4% | 4% | 1.05 |
| <b>CD24</b>          | CD24 molecule                                                                     | 4% | 4% | 0.87 |
| <b>CD73, NT5E</b>    | 5'-nucleotidase, ecto (CD73)                                                      | 4% | 4% | 0.87 |
| <b>CD86</b>          | CD86 molecule                                                                     | 4% | 5% | 0.75 |
| <b>CDH7</b>          | Cadherin 7, type 2 preproprotein                                                  | 4% | 4% | 1.05 |
| <b>CHRNA10</b>       | Cholinergic receptor, nicotinic, alpha 10                                         | 4% | 2% | 1.74 |
| <b>CHRNA9</b>        | Cholinergic receptor, nicotinic, alpha 9                                          | 4% | 7% | 0.58 |
| <b>HLA-F</b>         | Major histocompatibility complex, class I, F                                      | 4% | 7% | 0.52 |
| <b>IGF2R</b>         | Insulin-likeGrowth factor 1 receptor precursor                                    | 4% | 4% | 0.87 |
| <b>IGFBP2</b>        | Insulin-likeGrowth factor 2 mRNA binding protein 2                                | 4% | 3% | 1.31 |
| <b>MDH2</b>          | Malate dehydrogenase                                                              | 4% | 5% | 0.75 |
| <b>NDUFB5</b>        | NADH-ubiquinone oxidoreductase SGDH subunit                                       | 4% | 3% | 1.31 |
| <b>NDUFS4</b>        | NADH-ubiquinone oxidoreductase 18 kDa subunit                                     | 4% | 6% | 0.65 |



**Supplemental Table 1. Reactivities of patient and control sera on protein microarrays\***

|                       |                                                                                          |    |    |      |
|-----------------------|------------------------------------------------------------------------------------------|----|----|------|
| <b>SLC25A14</b>       | Solute carrier family 25 (aspartate/glutamate carrier), member 14                        | 4% | 4% | 0.87 |
| <b>UPK2</b>           | Uroplakin 2                                                                              | 4% | 3% | 1.31 |
| <b>UQCRB-V1</b>       | Ubiquinol-cytochrome C reductase complex 14 kDa protein, isoform 1                       | 4% | 4% | 0.87 |
| <b>VDAC2</b>          | Voltage-dependent anion-selective channel protein 2                                      | 4% | 2% | 1.74 |
| <b>AK2</b>            | Adenylate kinase isoenzyme 2                                                             | 3% | 3% | 1.18 |
| <b>ANXA1</b>          | Annexin I                                                                                | 3% | 7% | 0.52 |
| <b>ATP5O</b>          | ATP synthase oligomycin sensitivity conferral protein                                    | 3% | 6% | 0.59 |
| <b>BCKDK-V2</b>       | Branched chain ketoacid dehydrogenase kinase , isoform b                                 | 3% | 1% | 4.70 |
| <b>CD5</b>            | CD5 molecule                                                                             | 3% | 5% | 0.67 |
| <b>CDH20</b>          | Cadherin 20, type 2 preproprotein                                                        | 3% | 5% | 0.67 |
| <b>CHRNA6</b>         | Cholinergic receptor, nicotinic, alpha 6                                                 | 3% | 7% | 0.52 |
| <b>DSC1</b>           | Desmocollin 1 isoform Dsc1a preproprotein                                                | 3% | 5% | 0.67 |
| <b>DSG1_EC4</b>       | Desmoglein 1                                                                             | 3% | 5% | 0.67 |
| <b>FCRL2</b>          | Fc receptor-like 2                                                                       | 3% | 1% | 4.70 |
| <b>GPX4</b>           | Phospholipid hydroperoxideGlutathione peroxidase                                         | 3% | 6% | 0.59 |
| <b>HLA-C-V1</b>       | Major histocompatibility complex, class I, C                                             | 3% | 6% | 0.59 |
| <b>HSPE1</b>          | Heat shock 10kDa protein 1                                                               | 3% | 7% | 0.52 |
| <b>IGF2</b>           | Insulin-likeGrowth factor 2                                                              | 3% | 2% | 1.57 |
| <b>LARS2</b>          | Probable leucyl-tRNA synthetase                                                          | 3% | 4% | 0.78 |
| <b>MTX2-V2</b>        | Metaxin 2                                                                                | 3% | 3% | 1.18 |
| <b>PCDHB1</b>         | Protocadherin beta 1 precursor                                                           | 3% | 7% | 0.52 |
| <b>TOMM70A</b>        | Mitochondrial precursor proteins import receptor (Translocase of outermembrane TOM70)    | 3% | 6% | 0.59 |
| <b>CACNA1G-S2</b>     | VoltagedependentCalciumChannel alpha 1G                                                  | 3% | 4% | 0.84 |
| <b>CD68</b>           | CD68 molecule                                                                            | 3% | 7% | 0.46 |
| <b>CHRN3</b>          | Cholinergic receptor, nicotinic, beta                                                    | 3% | 4% | 0.84 |
| <b>COX4I1</b>         | Cytochrome c oxidase subunit IV isoform 1                                                | 3% | 7% | 0.46 |
| <b>CTNNA3-V1</b>      | Catenin, alpha 3                                                                         | 3% | 4% | 0.84 |
| <b>DLAT</b>           | Dihydropyruvate acetyltransferase component of pyruvate dehydrogenasecomplex             | 3% | 1% | 4.18 |
| <b>DSG1</b>           | Desmoglein 1                                                                             | 3% | 1% | 2.09 |
| <b>HLA-DQB1</b>       | Major histocompatibility complex, class II, DQ beta 1                                    | 3% | 4% | 0.84 |
| <b>HLCS</b>           | Biotin-protein ligase                                                                    | 3% | 6% | 0.52 |
| <b>MCCC1</b>          | Methylcrotonyl-CoA carboxylase alpha chain                                               | 3% | 5% | 0.60 |
| <b>SLC25A12</b>       | Solute carrier family 25 (aspartate/glutamate carrier), member 12                        | 3% | 5% | 0.60 |
| <b>TOMM20</b>         | Mitochondrial import receptor subunit TOM20 homolog                                      | 3% | 7% | 0.46 |
| <b>ANXA6</b>          | Annexin VI isoform 1                                                                     | 3% | 4% | 0.61 |
| <b>CACNA1S-S2</b>     | CalciumChannel, voltagedependent, L type,                                                | 3% | 1% | 3.66 |
| <b>CD43, SPN</b>      | Sialophorin                                                                              | 3% | 4% | 0.61 |
| <b>CD80</b>           | CD80 molecule                                                                            | 3% | 4% | 0.61 |
| <b>CD85, LILRB1</b>   | Leukocyte immunoglobulin-like receptor, subfamily B (with TM and ITIM domains), member 1 | 3% | 2% | 1.22 |
| <b>CHRN4-V2</b>       | Cholinergic receptor, nicotinic, beta 4                                                  | 3% | 2% | 1.22 |
| <b>COL4A3BP</b>       | Collagen, type IV, alpha 3 (Goodpasture antigen) binding protein                         | 3% | 4% | 0.73 |
| <b>COL9A3</b>         | Collagen, type IX, alpha 3                                                               | 3% | 3% | 0.91 |
| <b>COX6A2</b>         | Cytochrome c oxidase polypeptide VIa-heart                                               | 3% | 8% | 0.33 |
| <b>DSG3_A53625-88</b> | Desmoglein 3                                                                             | 3% | 8% | 0.33 |
| <b>DSG4</b>           | Desmoglein 4 isoform 2                                                                   | 3% | 5% | 0.52 |
| <b>GRB7</b>           | Growth factor receptor-bound protein 7                                                   | 3% | 7% | 0.41 |
| <b>ITGAX</b>          | Integrin alpha X precursor                                                               | 3% | 5% | 0.52 |
| <b>MYCBP</b>          | C-Myc binding protein                                                                    | 3% | 5% | 0.52 |
| <b>NDUFS3</b>         | NADH-ubiquinone oxidoreductase 30 kDa subunit                                            | 3% | 3% | 0.91 |
| <b>PCDHB11</b>        | Protocadherin beta 11 precursor                                                          | 3% | 2% | 1.22 |
| <b>PCDHB13</b>        | Protocadherin beta 13 precursor                                                          | 3% | 4% | 0.73 |
| <b>PDHX</b>           | pyruvate dehydrogenase complex,component X                                               | 3% | 7% | 0.37 |
| <b>PERP</b>           | PerP, TP53 apoptosis effector                                                            | 3% | 4% | 0.61 |
| <b>PERP</b>           | PerP, TP53 apoptosis effector                                                            | 3% | 5% | 0.52 |

**Supplemental Table 1. Reactivities of patient and control sera on protein microarrays\***

|                  |                                                                                                      |    |    |      |
|------------------|------------------------------------------------------------------------------------------------------|----|----|------|
| <b>SLC25A17</b>  | Solute carrier family 25 (mitochondrial carrier; peroxisomal membrane protein, 34kDa), member 17     | 3% | 3% | 0.91 |
| <b>TIMM17B</b>   | Mitochondrial import inner membrane translocase subunit TIM17 B (JM3)                                | 3% | 4% | 0.61 |
| <b>TIMM8B</b>    | Mitochondrial import inner membrane translocase subunit TIM8 B                                       | 3% | 5% | 0.52 |
| <b>CACNG3</b>    | Voltage-dependent calcium channel Gamma3                                                             | 2% | 4% | 0.52 |
| <b>CD1C</b>      | CD1c molecule                                                                                        | 2% | 3% | 0.78 |
| <b>CD7</b>       | CD7 molecule                                                                                         | 2% | 6% | 0.39 |
| <b>CD70</b>      | CD70 molecule                                                                                        | 2% | 6% | 0.39 |
| <b>CD95, FAS</b> | Fas (TNF receptor superfamily, member 6)                                                             | 2% | 4% | 0.52 |
| <b>CDH2</b>      | Cadherin 2, type 1 preproprotein                                                                     | 2% | 4% | 0.52 |
| <b>CHRFAM7A</b>  | CHRNA7FAM7A fusion isoform 1                                                                         | 2% | 4% | 0.52 |
| <b>CHRM1</b>     | Cholinergic receptor, muscarinic 1                                                                   | 2% | 3% | 0.78 |
| <b>CHRM5</b>     | Cholinergic receptor, muscarinic 5                                                                   | 2% | 5% | 0.45 |
| <b>CHRNA3</b>    | Cholinergic receptor, nicotinic, alpha 3                                                             | 2% | 4% | 0.63 |
| <b>CKMT2</b>     | Creatine kinase                                                                                      | 2% | 7% | 0.35 |
| <b>CPT2</b>      | Carnitine O-palmitoyltransferase II, mitochondrial precursor                                         | 2% | 7% | 0.31 |
| <b>CTNNB1</b>    | Catenin (cadherin-associated protein), beta 1,                                                       | 2% | 5% | 0.45 |
| <b>DIABLO</b>    | IAP-binding mitochondrial protein                                                                    | 2% | 1% | 1.57 |
| <b>DSG2</b>      | Desmoglein 2                                                                                         | 2% | 1% | 3.14 |
| <b>DSG3</b>      | Desmoglein 3                                                                                         | 2% | 7% | 0.35 |
| <b>GATM</b>      | Glycine amidinotransferase                                                                           | 2% | 1% | 3.14 |
| <b>GPT</b>       | Alanine aminotransferase                                                                             | 2% | 4% | 0.52 |
| <b>HRH1</b>      | Histamine receptor H1                                                                                | 2% | 4% | 0.63 |
| <b>ITGAL</b>     | Integrin alpha L isoform a precursor                                                                 | 2% | 3% | 0.78 |
| <b>NNT-V2</b>    | NAD(P) transhydrogenase                                                                              | 2% | 4% | 0.63 |
| <b>OXCT1</b>     | Succinyl-CoA:3-ketoacid-coenzyme A transferase                                                       | 2% | 4% | 0.63 |
| <b>PCDH21</b>    | Protocadherin 21 precursor                                                                           | 2% | 6% | 0.39 |
| <b>PDGFR</b>     | Platelet-derived growth factor receptor                                                              | 2% | 4% | 0.63 |
| <b>SLC25A1</b>   | solute carrier family 25 (mitochondrial carrier; citrate transporter), member 1                      | 2% | 4% | 0.63 |
| <b>SLC25A4</b>   | solute carrier family 25 (mitochondrial carrier; citrate transporter), member 4                      | 2% | 4% | 0.63 |
| <b>ACTB</b>      | Actin, beta                                                                                          | 2% | 4% | 0.52 |
| <b>ACTG1</b>     | Actin, Gamma 1                                                                                       | 2% | 3% | 0.65 |
| <b>AGTRAP</b>    | Angiotensin II receptor, type 2                                                                      | 2% | 3% | 0.65 |
| <b>AK3</b>       | GTP:AMP phosphotransferase                                                                           | 2% | 7% | 0.29 |
| <b>ALAS1</b>     | Aminolevulinic acid synthase 1                                                                       | 2% | 4% | 0.44 |
| <b>ATP2C1-V2</b> | ATPase, Ca <sup>++</sup> transporting, type 2C, membe                                                | 2% | 6% | 0.33 |
| <b>BCAT2</b>     | Branched-chain amino acid aminotransferase                                                           | 2% | 6% | 0.33 |
| <b>BCKDHB</b>    | Branched chain keto acid dehydrogenase E1, beta polypeptide                                          | 2% | 4% | 0.44 |
| <b>C5orf39</b>   | Annexin II receptor                                                                                  | 2% | 3% | 0.65 |
| <b>CACNB1</b>    | Calcium channel, voltage-dependent, beta 1                                                           | 2% | 1% | 2.61 |
| <b>CACNG1</b>    | Voltage-dependent calcium channel Gamma1                                                             | 2% | 2% | 0.87 |
| <b>CACNG4</b>    | Voltage-dependent calcium channel Gamma4                                                             | 2% | 4% | 0.44 |
| <b>CD83</b>      | CD83 molecule                                                                                        | 2% | 5% | 0.37 |
| <b>CD9</b>       | CD9 molecule                                                                                         | 2% | 4% | 0.44 |
| <b>CDH19</b>     | Cadherin 19, type 2 preproprotein                                                                    | 2% | 4% | 0.52 |
| <b>CDH23</b>     | Cadherin                                                                                             | 2% | 4% | 0.52 |
| <b>CHRNA1-V1</b> | Cholinergic receptor, nicotinic, alpha 1 isoform b                                                   | 2% | 4% | 0.44 |
| <b>CHRNA4-V2</b> | Cholinergic receptor, nicotinic, alpha 4 subunit                                                     | 2% | 5% | 0.37 |
| <b>CHRNA6</b>    | Cholinergic receptor, nicotinic, alpha 6                                                             | 2% | 6% | 0.33 |
| <b>COL10A1</b>   | Collagen, type X, alpha 1                                                                            | 2% | 4% | 0.44 |
| <b>COL19A1</b>   | Collagen, type XIX, alpha 1                                                                          | 2% | 4% | 0.44 |
| <b>COL4A6</b>    | Collagen, type IV, alpha 6                                                                           | 2% | 6% | 0.33 |
| <b>COX6C</b>     | Cytochrome c oxidase polypeptide VIc precursor                                                       | 2% | 5% | 0.37 |
| <b>CTNND1-V1</b> | Catenin, delta 1 isoform 1ABC                                                                        | 2% | 3% | 0.65 |
| <b>DBT</b>       | Lipoamide acyltransferase component of branched-chain alpha-keto acid dehydrogenase complex subunit) | 2% | 5% | 0.37 |

**Supplemental Table 1. Reactivities of patient and control sera on protein microarrays\***

|                    |                                                                                              |    |    |      |
|--------------------|----------------------------------------------------------------------------------------------|----|----|------|
| <b>DNAJA3</b>      | DnaJ (Hsp40) homolog, subfamily A, member 3                                                  | 2% | 7% | 0.26 |
| <b>DSC2</b>        | Desmocollin 2 isoform Dsc2a preproprotein                                                    | 2% | 6% | 0.33 |
| <b>DSG3_A697S2</b> | Desmoglein 3                                                                                 | 2% | 7% | 0.26 |
| <b>DSG4</b>        | Desmoglein 4 isoform 2                                                                       | 2% | 3% | 0.65 |
| <b>F2RL2</b>       | Coagulation factor II (thrombin) receptorlike 2                                              | 2% | 4% | 0.44 |
| <b>FDX1</b>        | Adrenodoxin, mitochondrial precursor                                                         | 2% | 5% | 0.37 |
| <b>GRB2</b>        | Growth factor receptor-bound protein 2 isoform                                               | 2% | 4% | 0.52 |
| <b>HCCS</b>        | Cytochrome c-type heme lyase                                                                 | 2% | 5% | 0.37 |
| <b>HLA-DRA</b>     | Major histocompatibility complex, class II, DR alpha                                         | 2% | 4% | 0.52 |
| <b>HRH4</b>        | Histamine H4 receptor isoform 1                                                              | 2% | 5% | 0.37 |
| <b>ITGB8</b>       | Integrin, beta 8                                                                             | 2% | 4% | 0.44 |
| <b>NDUFA5</b>      | NADH-ubiquinone oxidoreductase 13 kDa-B subunit                                              | 2% | 6% | 0.33 |
| <b>NDUFS2</b>      | NADH-ubiquinone oxidoreductase 49 kDa subunit                                                | 2% | 4% | 0.44 |
| <b>NFS1</b>        | Nitrogen fixation 1 homolog                                                                  | 2% | 1% | 2.61 |
| <b>NFS2</b>        | Nitrogen fixation 2 homolog                                                                  | 2% | 1% | 2.61 |
| <b>PCDHB14</b>     | Protocadherin beta 14 precursor                                                              | 2% | 4% | 0.44 |
| <b>PERP</b>        | PerP, TP53 apoptosis effector                                                                | 2% | 5% | 0.37 |
| <b>PERP</b>        | PerP, TP53 apoptosis effector                                                                | 2% | 4% | 0.44 |
| <b>PPOX</b>        | Protoporphyrinogen oxidase                                                                   | 2% | 3% | 0.65 |
| <b>SHMT1</b>       | Serine hydroxymethyltransferase, cytosolic                                                   | 2% | 4% | 0.52 |
| <b>SLC25A10</b>    | solute carrier family 25 (mitochondrial carrier; citrate transporter), member 10             | 2% | 3% | 0.65 |
| <b>SLC25A11</b>    | solute carrier family 25 (mitochondrial carrier; citrate transporter), member 11             | 2% | 1% | 1.31 |
| <b>SLC25A31</b>    | Solute carrier family 25 (mitochondrial carrier; adenine nucleotide translocator), member 31 | 2% | 4% | 0.52 |
| <b>SLC6A6-V3</b>   | solute carrier family 6 (neurotransmitter)                                                   | 2% | 5% | 0.37 |
| <b>SURF1</b>       | Surfeit locus protein 1                                                                      | 2% | 5% | 0.37 |
| <b>TIMM23</b>      | Mitochondrial import inner membrane translocase subunit TIM23                                | 2% | 7% | 0.29 |
| <b>TK2</b>         | Thymidine kinase 2, mitochondrial                                                            | 2% | 6% | 0.33 |
| <b>TST</b>         | Thiosulfate sulfurtransferase (Rhodanese)                                                    | 2% | 6% | 0.33 |
| <b>UCRC</b>        | Ubiquinol-cytochrome c reductase, complex III subunit X                                      | 2% | 5% | 0.37 |
| <b>ABCB6</b>       | ATP-binding cassette transporter 6                                                           | 2% | 6% | 0.26 |
| <b>ABCD4</b>       | ATP-binding cassette, sub-family D (ALD), member 4                                           | 2% | 6% | 0.26 |
| <b>ACADS</b>       | Acyl-CoA dehydrogenase, short-chain specific                                                 | 2% | 4% | 0.42 |
| <b>ACADSB</b>      | Acyl-CoA dehydrogenase, short/branched chain specific                                        | 2% | 4% | 0.35 |
| <b>ACSL3</b>       | Acyl-CoA synthetase long-chain family member 3                                               | 2% | 4% | 0.35 |
| <b>ACTN2</b>       | Actinin, Alpha 2                                                                             | 2% | 5% | 0.30 |
| <b>AK3L1</b>       | Adenylate kinase 3                                                                           | 2% | 2% | 0.70 |
| <b>ATP2C1-V1</b>   | ATPase, Ca <sup>++</sup> transporting, type 2C, member 1                                     | 2% | 4% | 0.35 |
| <b>ATP5A1</b>      | ATP synthase alpha chain                                                                     | 2% | 4% | 0.42 |
| <b>CACNA1G-S1</b>  | Voltage-dependent calcium channel alpha 1G                                                   | 2% | 6% | 0.26 |
| <b>CD72</b>        | CD72 molecule                                                                                | 2% | 5% | 0.30 |
| <b>CDH12</b>       | Cadherin 12, type 2 preproprotein                                                            | 2% | 4% | 0.42 |
| <b>CHRFAM7A</b>    | CHRNA7FAM7A fusion isoform 1                                                                 | 2% | 4% | 0.35 |
| <b>CKMT1A</b>      | Creatine kinase                                                                              | 2% | 4% | 0.35 |
| <b>COL20A1</b>     | Collagen, type XX, alpha 1                                                                   | 2% | 5% | 0.30 |
| <b>COL6A1</b>      | Collagen, type VI, alpha 1                                                                   | 2% | 5% | 0.30 |
| <b>DLD</b>         | Dihydrolipoamide dehydrogenase                                                               | 2% | 3% | 0.52 |
| <b>DSG1_EC1</b>    | Desmoglein 1                                                                                 | 2% | 7% | 0.23 |
| <b>DSG3_EC4</b>    | Desmoglein 3                                                                                 | 2% | 5% | 0.30 |
| <b>DSG3-EC1</b>    | Desmoglein 3                                                                                 | 2% | 5% | 0.30 |
| <b>GRIA2</b>       | Glutamate receptor, ionotropic, AMPA2                                                        | 2% | 3% | 0.52 |
| <b>HADHA</b>       | Trifunctional enzyme alpha subunit                                                           | 2% | 5% | 0.30 |
| <b>HK1-V4</b>      | Hexokinase, type I                                                                           | 2% | 3% | 0.52 |
| <b>ITGB1BP3</b>    | Integrin beta 1 binding protein 3                                                            | 2% | 4% | 0.42 |
| <b>JUP-V1</b>      | Junction plakoglobin                                                                         | 2% | 5% | 0.30 |

**Supplemental Table 1. Reactivities of patient and control sera on protein microarrays\***

|                       |                                                                                             |    |    |      |
|-----------------------|---------------------------------------------------------------------------------------------|----|----|------|
| <b>MLYCD</b>          | Malonyl-CoA decarboxylase                                                                   | 2% | 4% | 0.35 |
| <b>NDUFA10</b>        | NADH-ubiquinone oxidoreductase 42 kDa subunit                                               | 2% | 3% | 0.52 |
| <b>PCDHB16</b>        | Protocadherin beta 16 precursor                                                             | 2% | 4% | 0.35 |
| <b>PERP</b>           | PerP, TP53 apoptosis effector                                                               | 2% | 4% | 0.42 |
| <b>PKP2</b>           | Plakophilin 2 isoform 2a                                                                    | 2% | 7% | 0.21 |
| <b>SLC25A18</b>       | Solute carrier family 25, member 18                                                         | 2% | 4% | 0.42 |
| <b>SLC25A2</b>        | Solute carrier family 25 (mitochondrial carrier; ornithine transporter) member 2            | 2% | 3% | 0.52 |
| <b>SLC7A13</b>        | solute carrier family 7, (cationic amino acid                                               | 2% | 6% | 0.26 |
| <b>TOMM40</b>         | Probable mitochondrial import receptor subunit TOM40 homolog                                | 2% | 4% | 0.35 |
| <b>UPK1B</b>          | Uroplakin 1B                                                                                | 2% | 4% | 0.35 |
| <b>VDAC3</b>          | Voltage-dependent anion-selective channel protein 3                                         | 2% | 3% | 0.52 |
| <b>YWHAE</b>          | Tyrosine 3-monooxygenase/tryptophan 5-monooxygenase activation protein, epsilon polypeptide | 2% | 4% | 0.35 |
| <b>ACADM-V3</b>       | Acyl-CoA dehydrogenase, medium-chain specific                                               | 1% | 1% | 1.57 |
| <b>ANXA13</b>         | AnnexinA13 isoform b                                                                        | 1% | 1% | 0.78 |
| <b>ATP2C1-V3</b>      | ATPase, Ca <sup>++</sup> transporting, type 2C, membe                                       | 1% | 6% | 0.20 |
| <b>ATP7B</b>          | Copper-transporting ATPase 2                                                                | 1% | 4% | 0.31 |
| <b>CCKAR</b>          | Cholecystokinin A receptor                                                                  | 1% | 1% | 0.78 |
| <b>CD1A</b>           | CD1a molecule                                                                               | 1% | 4% | 0.26 |
| <b>CD38</b>           | CD38 molecule                                                                               | 1% | 5% | 0.22 |
| <b>CD66a, CEACAM1</b> | Carcinoembryonic antigen-related cell adhesion molecule 1 (biliaryGlycoprotein)             | 1% | 6% | 0.20 |
| <b>CD70</b>           | CD70 molecule                                                                               | 1% | 5% | 0.22 |
| <b>CD82</b>           | CD82 molecule                                                                               | 1% | 5% | 0.22 |
| <b>CD84</b>           | CD84 molecule                                                                               | 1% | 6% | 0.20 |
| <b>CD8B</b>           | CD8b molecule                                                                               | 1% | 5% | 0.22 |
| <b>CHRNA3</b>         | Cholinergic receptor, nicotinic, alpha 3                                                    | 1% | 3% | 0.39 |
| <b>CHRNA4-V1</b>      | Cholinergic receptor, nicotinic, alpha 4 subunit                                            | 1% | 1% | 0.78 |
| <b>CHRNA4-V2</b>      | Cholinergic receptor, nicotinic, alpha 4 subunit                                            | 1% | 1% | 0.78 |
| <b>CHRNA7</b>         | Cholinergic receptor, nicotinic, alpha 7                                                    | 1% | 3% | 0.39 |
| <b>CHRNG</b>          | Cholinergic receptor, nicotinic,Gamma                                                       | 1% | 1% | 0.78 |
| <b>CKMT1A</b>         | Creatine kinase                                                                             | 1% | 1% | 0.78 |
| <b>CTNND2</b>         | Catenin (cadherin-associated protein), delta 1,                                             | 1% | 7% | 0.16 |
| <b>DSC3</b>           | Desmocollin 3 isoform Dsc3a preproprotein                                                   | 1% | 7% | 0.17 |
| <b>DSG1_1-496</b>     | Desmoglein 1                                                                                | 1% | 6% | 0.20 |
| <b>DSG3</b>           | Desmoglein 3                                                                                | 1% | 1% | 1.57 |
| <b>DSG3_EC3</b>       | Desmoglein 3                                                                                | 1% | 5% | 0.22 |
| <b>DSG3</b>           | Desmoglein 3                                                                                | 1% | 5% | 0.22 |
| <b>DSG4</b>           | Desmoglein 4 isoform 2                                                                      | 1% | 5% | 0.22 |
| <b>DSG4</b>           | Desmoglein 4 isoform 2                                                                      | 1% | 4% | 0.31 |
| <b>EPS8</b>           | EpidermalGrowth factor receptor pathway substrate 8                                         | 1% | 5% | 0.22 |
| <b>ESR1</b>           | Estrogen receptor 1                                                                         | 1% | 6% | 0.20 |
| <b>FCRL3</b>          | Fc receptor-like 3 precursor                                                                | 1% | 6% | 0.20 |
| <b>FECH</b>           | Ferrochelataase                                                                             | 1% | 4% | 0.31 |
| <b>FGFR2</b>          | FibroblastGrowth factor receptor 2                                                          | 1% | 5% | 0.22 |
| <b>GRIA1</b>          | Glutamate receptor, ionotropic, AMPA1                                                       | 1% | 4% | 0.31 |
| <b>GSR</b>            | Glutathione reductase                                                                       | 1% | 5% | 0.22 |
| <b>HLA-A_V2</b>       | Major histocompatibility complex, class I, A                                                | 1% | 4% | 0.26 |
| <b>IRF8</b>           | Interferon regulatory factor 8                                                              | 1% | 5% | 0.22 |
| <b>ITGA2B</b>         | Integrin alpha 2b preproprotein                                                             | 1% | 6% | 0.20 |
| <b>ITGA9</b>          | Integrin, alpha 9 precursor                                                                 | 1% | 6% | 0.20 |
| <b>KIF1B</b>          | Kinesin-like protein KIF1B (Klp)                                                            | 1% | 4% | 0.31 |
| <b>MGST1</b>          | MicrosomalGlutathione S-transferase 1                                                       | 1% | 7% | 0.17 |
| <b>OAT</b>            | Ornithine aminotransferase                                                                  | 1% | 7% | 0.17 |
| <b>PCDH1</b>          | Protocadherin 1 isoform 2 precursor                                                         | 1% | 5% | 0.22 |
| <b>PCDHB7</b>         | Protocadherin beta 7 precursor                                                              | 1% | 2% | 0.52 |

**Supplemental Table 1. Reactivities of patient and control sera on protein microarrays\***

|                     |                                                              |    |    |      |
|---------------------|--------------------------------------------------------------|----|----|------|
| <b>PEMT</b>         | Phosphatidylethanolamine N-methyltransferase                 | 1% | 4% | 0.31 |
| <b>SHMT2</b>        | Serine hydroxymethyltransferase 2                            | 1% | 4% | 0.26 |
| <b>SLC38A2</b>      | Solute carrier family 38, member 2                           | 1% | 7% | 0.16 |
| <b>TACR3</b>        | Tachykinin receptor 3                                        | 1% | 1% | 0.78 |
| <b>TGFBR1</b>       | TransformingGrowth factor, beta receptor I                   | 1% | 1% | 0.78 |
| <b>TGFBR3</b>       | TransformingGrowth factor, beta receptor III                 | 1% | 6% | 0.20 |
| <b>UCP3</b>         | Mitochondrial uncoupling protein 3 (UCP 3)                   | 1% | 7% | 0.17 |
| <b>UPK1A</b>        | Uroplakin 1A                                                 | 1% | 1% | 0.78 |
| <b>UPK3A</b>        | Uroplakin 3A precursor                                       | 1% | 1% | 0.78 |
| <b>ATP8B1</b>       | ATP-binding cassette transporter 8                           | 1% | 5% | 0.15 |
| <b>ACADL</b>        | Acyl-CoA dehydrogenase, long-chain specific                  | 1% | 3% | 0.26 |
| <b>ACADVL</b>       | Acyl-CoA dehydrogenase, very-long-chain specific             | 1% | 4% | 0.17 |
| <b>ACSL1</b>        | Acyl-CoA synthetase long-chain family member 1               | 1% | 5% | 0.15 |
| <b>AIFM1</b>        | Angiotensin II receptor-associated protein                   | 1% | 5% | 0.15 |
| <b>ANXA11</b>       | AnnexinA11                                                   | 1% | 1% | 0.52 |
| <b>ANXA2</b>        | AnnexinA2 isoform 1                                          | 1% | 4% | 0.17 |
| <b>ATP2C1</b>       | ATPase, Ca++ transporting, type 2C, member 1                 | 1% | 5% | 0.15 |
| <b>BCKDHA</b>       | Branched chain keto acid dehydrogenase E1, alpha polypeptide | 1% | 7% | 0.12 |
| <b>BDH1</b>         | D-beta-hydroxybutyrate dehydrogenase                         | 1% | 7% | 0.12 |
| <b>CACNA1S</b>      | Calcium channel, voltage-dependent, L type, S1               | 1% | 3% | 0.26 |
| <b>CACNA2D4</b>     | Calcium channel, voltage-dependent, alpha 2D4                | 1% | 6% | 0.13 |
| <b>CD77, A4GALT</b> | Alpha 1,4-galactosyltransferase                              | 1% | 7% | 0.12 |
| <b>CD8A</b>         | CD8a molecule                                                | 1% | 4% | 0.17 |
| <b>CDH15</b>        | Cadherin 15 preproprotein                                    | 1% | 4% | 0.17 |
| <b>CDH18</b>        | Cadherin 18, type 2 preproprotein                            | 1% | 3% | 0.26 |
| <b>CHRM1</b>        | Cholinergic receptor, muscarinic 1                           | 1% | 4% | 0.17 |
| <b>CHRM3</b>        | Cholinergic receptor, muscarinic 3                           | 1% | 1% | 0.52 |
| <b>CHRNA1</b>       | Cholinergic receptor, nicotinic, alpha 1 isoform b           | 1% | 5% | 0.15 |
| <b>CHRNA7</b>       | Cholinergic receptor, nicotinic, alpha 7                     | 1% | 4% | 0.17 |
| <b>CHRNE</b>        | Cholinergic receptor, nicotinic, epsilon                     | 1% | 2% | 0.35 |
| <b>COL14A1</b>      | Collagen, type XIV, alpha 1                                  | 1% | 7% | 0.10 |
| <b>COL18A1</b>      | Collagen, type XVIII, alpha 1                                | 1% | 7% | 0.10 |
| <b>COL24A1</b>      | Collagen, type XXIV, alpha 1                                 | 1% | 5% | 0.15 |
| <b>COX4I2</b>       | Cytochrome c oxidase subunit IV isoform 2                    | 1% | 1% | 0.52 |
| <b>COX7A2</b>       | Cytochrome c oxidase polypeptide VIIa-liver/heart            | 1% | 7% | 0.10 |
| <b>CYC1</b>         | Cytochrome c1, heme protein                                  | 1% | 3% | 0.26 |
| <b>DSG1</b>         | Desmoglein 1                                                 | 1% | 4% | 0.17 |
| <b>DSG1_EC2</b>     | Desmoglein 1                                                 | 1% | 4% | 0.17 |
| <b>DSG1_ECA</b>     | Desmoglein 1                                                 | 1% | 6% | 0.13 |
| <b>DSG1-EC3</b>     | Desmoglein 1                                                 | 1% | 5% | 0.15 |
| <b>DSG3_1-161</b>   | Desmoglein 3                                                 | 1% | 6% | 0.13 |
| <b>DSG3-EC2</b>     | Desmoglein 3                                                 | 1% | 5% | 0.15 |
| <b>ETFDH</b>        | Electron transfer flavoprotein-ubiquinone oxidoreductase     | 1% | 4% | 0.17 |
| <b>EVPL-S1</b>      | Envoplakin, segment 1                                        | 1% | 1% | 0.52 |
| <b>GLUD1</b>        | Glutamate dehydrogenase 1                                    | 1% | 4% | 0.21 |
| <b>GRIN2C</b>       | Glutamate receptor, ionotropic, N-methyl D-aspartate 2C      | 1% | 4% | 0.21 |
| <b>HLA-DPB1</b>     | Major histocompatibility complex, class II, DP alpha 1       | 1% | 6% | 0.13 |
| <b>LONP1</b>        | Lon peptidase 1, mitochondria                                | 1% | 5% | 0.15 |
| <b>MCCC2</b>        | Methylcrotonyl-CoA carboxylase beta chain                    | 1% | 6% | 0.13 |
| <b>MUT</b>          | Methylmalonyl-CoA mutase                                     | 1% | 4% | 0.17 |
| <b>NDUFA3</b>       | NADH-ubiquinone oxidoreductase B9 subunit                    | 1% | 7% | 0.10 |
| <b>NDUFB1</b>       | NADH-ubiquinone oxidoreductase MNLL subunit                  | 1% | 7% | 0.12 |
| <b>NDUFC2</b>       | NADH-ubiquinone oxidoreductase subunit B14.5b                | 1% | 4% | 0.17 |
| <b>NDUFV3</b>       | NADH-ubiquinone oxidoreductase 9 kDa subunit                 | 1% | 6% | 0.13 |

**Supplemental Table 1. Reactivities of patient and control sera on protein microarrays\***

|                    |                                                                        |    |    |      |
|--------------------|------------------------------------------------------------------------|----|----|------|
| <b>NLN</b>         | Neurolysin, mitochondrial precursor                                    | 1% | 3% | 0.26 |
| <b>NNT-V1</b>      | NAD(P) transhydrogenase                                                | 1% | 4% | 0.17 |
| <b>PCDH17</b>      | Protocadherin 17 precursor                                             | 1% | 4% | 0.21 |
| <b>PCDHB2</b>      | Protocadherin beta 2 precursor                                         | 1% | 4% | 0.21 |
| <b>PCDHB4</b>      | Protocadherin beta 4 precursor                                         | 1% | 2% | 0.35 |
| <b>PDGFRB</b>      | Platelet-derivedGrowth factor receptor beta                            | 1% | 3% | 0.26 |
| <b>PDHA2</b>       | Pyruvate dehydrogenase E1 component alpha subunit, testis-specificform | 1% | 3% | 0.26 |
| <b>PKD2</b>        | Pyruvate dehydrogenase [lipoamide]] kinase isozyme 2                   | 1% | 3% | 0.26 |
| <b>PKD3</b>        | Pyruvate dehydrogenase [lipoamide]] kinase isozyme 3                   | 1% | 4% | 0.17 |
| <b>PERP</b>        | PerP, TP53 apoptosis effector                                          | 1% | 5% | 0.15 |
| <b>PKP1</b>        | Plakophilin 1 isoform 1b                                               | 1% | 1% | 1.05 |
| <b>SDHB</b>        | Succinate dehydrogenase (ubiquinone) iron-sulfur protein               | 1% | 4% | 0.17 |
| <b>SDHC</b>        | Succinate dehydrogenase cytochrome b560 subunit                        | 1% | 5% | 0.15 |
| <b>SLC25A13</b>    | Solute carrier family 25 (aspartate/glutamate carrier), member 13      | 1% | 4% | 0.21 |
| <b>SLC25A27</b>    | Solute carrier family 25, member 27                                    | 1% | 4% | 0.17 |
| <b>SLC7A10</b>     | solute carrier family 7, member 10                                     | 1% | 4% | 0.17 |
| <b>TK1</b>         | Thymidine kinase                                                       | 1% | 6% | 0.13 |
| <b>ACADVL-V1</b>   | Acyl-CoA dehydrogenase, very-long-chain specific                       | 0% | 4% | 0.10 |
| <b>ACSL4</b>       | Acyl-CoA synthetase long-chain family member 4                         | 0% | 5% | 0.07 |
| <b>ALDH2</b>       | Aldehyde dehydrogenase                                                 | 0% | 2% | 0.17 |
| <b>ANXA10</b>      | AnnexinA10                                                             | 0% | 5% | 0.07 |
| <b>ANXA7</b>       | Annexin VII isoform 2                                                  | 0% | 1% | 0.26 |
| <b>ATP2C1-V4</b>   | ATPase, Ca++ transporting, type 2C, membe                              | 0% | 7% | 0.06 |
| <b>CACNA1G</b>     | Voltage-dependentCalciumChannel alpha 1G                               | 0% | 4% | 0.10 |
| <b>CACNB4</b>      | CalciumChannel, voltage-dependent, beta 4                              | 0% | 4% | 0.09 |
| <b>CACNG5</b>      | Voltage-dependent calcium channelGamma5                                | 0% | 5% | 0.07 |
| <b>CD28</b>        | CD28 molecule                                                          | 0% | 4% | 0.09 |
| <b>CD62P, SELP</b> | Selectin P (granule membrane protein 140kDa, antigen CD62)             | 0% | 6% | 0.07 |
| <b>CDH6</b>        | Cadherin 6, type 2 preproprotein                                       | 0% | 4% | 0.10 |
| <b>CHRM2</b>       | Cholinergic receptor, muscarinic 2                                     | 0% | 5% | 0.07 |
| <b>CHRM5</b>       | Cholinergic receptor, muscarinic 5                                     | 0% | 3% | 0.13 |
| <b>CHRNA2</b>      | Cholinergic receptor, nicotinic, alpha 2                               | 0% | 4% | 0.10 |
| <b>CHRNB2</b>      | Cholinergic receptor, nicotinic, beta 2                                | 0% | 6% | 0.07 |
| <b>CHRNE</b>       | Cholinergic receptor, nicotinic, epsilon                               | 0% | 7% | 0.06 |
| <b>COX5A</b>       | Cytochrome c oxidase polypeptide Va                                    | 0% | 6% | 0.07 |
| <b>COX7A1</b>      | Cytochrome c oxidase polypeptide VIIa-heart                            | 0% | 4% | 0.09 |
| <b>DSC2</b>        | Desmocollin 2 isoform Dsc2a preproprotein                              | 0% | 4% | 0.09 |
| <b>DSG1-EC4</b>    | Desmoglein 1                                                           | 0% | 7% | 0.06 |
| <b>DSG3</b>        | Desmoglein 3                                                           | 0% | 5% | 0.07 |
| <b>DSG3_S1</b>     | Desmoglein 3                                                           | 0% | 7% | 0.05 |
| <b>EGFR</b>        | EpidermalGrowth factor receptor                                        | 0% | 4% | 0.10 |
| <b>EPS8L1-V2</b>   | EPS8-like 1, isoform b                                                 | 0% | 3% | 0.13 |
| <b>ETFEB-V1</b>    | Electron transfer flavoprotein beta-subunit (Beta-ETF), isoform 2      | 0% | 4% | 0.10 |
| <b>EVPL-S3</b>     | Envoplakin, segment 2                                                  | 0% | 1% | 0.26 |
| <b>F2R</b>         | Coagulation factor II (thrombin) receptor                              | 0% | 4% | 0.10 |
| <b>F2RL3</b>       | Coagulation factor II (thrombin) receptorlike 3                        | 0% | 5% | 0.07 |
| <b>GRB14</b>       | Growth factor receptor-bound protein 14                                | 0% | 6% | 0.07 |
| <b>GRIN2D</b>      | Glutamate receptor, ionotropic, N-methyl D-aspartate 2D                | 0% | 5% | 0.07 |
| <b>GSTK1-V1</b>    | Glutathione S-transferase kappa 1,isoform b                            | 0% | 6% | 0.07 |
| <b>GSTK1-V2</b>    | Glutathione S-transferase kappa 1,isoform a                            | 0% | 7% | 0.06 |
| <b>HADHB</b>       | Trifunctional enzyme beta subunit                                      | 0% | 7% | 0.06 |
| <b>ITGA3</b>       | Integrin alpha 3 isoform a precursor                                   | 0% | 5% | 0.07 |
| <b>ITGB3</b>       | Integrin beta chain, beta 3 precursor                                  | 0% | 6% | 0.07 |
| <b>ITGB3BP-V2</b>  | Integrin beta 3 binding protein, isoform 2                             | 0% | 4% | 0.09 |

**Supplemental Table 1. Reactivities of patient and control sera on protein microarrays\***

|                     |                                                                                               |    |    |      |
|---------------------|-----------------------------------------------------------------------------------------------|----|----|------|
| <b>ITGBL1</b>       | Integrin, beta-like 1                                                                         | 0% | 4% | 0.09 |
| <b>NDUFA12</b>      | NADH dehydrogenase [ubiquinone] 1 alpha subcomplex subunit 12;                                | 0% | 6% | 0.07 |
| <b>NDUFA6</b>       | NADH-ubiquinone oxidoreductase B14 subunit                                                    | 0% | 5% | 0.07 |
| <b>NDUFB3</b>       | NADH-ubiquinone oxidoreductase B12 subunit                                                    | 0% | 6% | 0.07 |
| <b>NDUFB7</b>       | NADH-ubiquinone oxidoreductase B18 subunit                                                    | 0% | 7% | 0.06 |
| <b>NDUFB8</b>       | NADH-ubiquinone oxidoreductase ASH1 subunit                                                   | 0% | 7% | 0.05 |
| <b>NDUFB9</b>       | NADH-ubiquinone oxidoreductase B22 subunit                                                    | 0% | 7% | 0.05 |
| <b>NDUFS5</b>       | NADH-ubiquinone oxidoreductase 15 kDa subunit                                                 | 0% | 9% | 0.04 |
| <b>NME4</b>         | Nucleoside diphosphate kinase                                                                 | 0% | 5% | 0.07 |
| <b>NR3C2</b>        | Nuclear receptor subfamily 3, group C, member 2                                               | 0% | 4% | 0.09 |
| <b>PCDHB3</b>       | Protocadherin beta 3 precursor                                                                | 0% | 4% | 0.10 |
| <b>PCDHB8</b>       | Protocadherin beta 8 precursor                                                                | 0% | 4% | 0.09 |
| <b>PRDX6</b>        | Peroxiredoxin 6                                                                               | 0% | 7% | 0.06 |
| <b>SLC25A3</b>      | solute carrier family 25 (mitochondrial carrier; citrate transporter), member 3               | 0% | 2% | 0.17 |
| <b>SLC25A32</b>     | Solute carrier family 25, member 32                                                           | 0% | 3% | 0.13 |
| <b>SLC38A7</b>      | Solute carrier family 38, member 7                                                            | 0% | 6% | 0.07 |
| <b>UCP1</b>         | Mitochondrial brown fat uncoupling protein 1 (UCP 1) (Thermogenin)                            | 0% | 4% | 0.09 |
| <b>UQCRC1</b>       | Ubiquinol-cytochrome C reductase complex core protein I                                       | 0% | 7% | 0.05 |
| <b>UQCRH</b>        | Ubiquinol-cytochrome C reductase complex 11 kDa protein                                       | 0% | 5% | 0.07 |
| <b>VDAC1</b>        | Voltage-dependent anion-selective channel protein 1                                           | 0% | 6% | 0.07 |
| <b>ABCB9-V4</b>     | ATP-binding cassette, sub-family B (MDR/TAP), member 9                                        | 0% | 6% | 0.00 |
| <b>ACSL5</b>        | Acyl-CoA synthetase long-chain family member 5                                                | 0% | 1% | 0.00 |
| <b>ALAS2</b>        | Aminolevulinic acid, delta-, synthase 2                                                       | 0% | 6% | 0.00 |
| <b>ALDH1B1</b>      | Aldehyde dehydrogenase X                                                                      | 0% | 6% | 0.00 |
| <b>ATP5A1</b>       | ATP synthase alpha chain                                                                      | 0% | 4% | 0.00 |
| <b>BCAT2</b>        | Branched-chain amino acid aminotransferase                                                    | 0% | 4% | 0.00 |
| <b>BCKDK-V1</b>     | Branched chain ketoacid dehydrogenase kinase, isoform a                                       | 0% | 1% | 0.00 |
| <b>CACNA1S</b>      | Calcium channel, voltage-dependent, L type,                                                   | 0% | 3% | 0.00 |
| <b>CD31, PECAM1</b> | Platelet/endothelial cell adhesion molecule                                                   | 0% | 6% | 0.00 |
| <b>CD54 ICAM1</b>   | Intercellular adhesion molecule 1                                                             | 0% | 7% | 0.00 |
| <b>CD6</b>          | CD6 molecule                                                                                  | 0% | 7% | 0.00 |
| <b>CD62L, SELL</b>  | Selectin L                                                                                    | 0% | 7% | 0.00 |
| <b>CD87, PLAUR</b>  | Plasminogen activator, urokinase receptor                                                     | 0% | 3% | 0.00 |
| <b>CHRNA1-V1</b>    | Cholinergic receptor, nicotinic, alpha 1 isoform b                                            | 0% | 1% | 0.00 |
| <b>CHRNA2</b>       | Cholinergic receptor, nicotinic, alpha 2                                                      | 0% | 7% | 0.00 |
| <b>CHRNA9</b>       | Cholinergic receptor, nicotinic, alpha 9                                                      | 0% | 6% | 0.00 |
| <b>CHRNE</b>        | Cholinergic receptor, nicotinic, epsilon                                                      | 0% | 6% | 0.00 |
| <b>CHRNG</b>        | Cholinergic receptor, nicotinic, gamma                                                        | 0% | 6% | 0.00 |
| <b>CRHR2</b>        | Corticotropin releasing hormone receptor 2                                                    | 0% | 1% | 0.00 |
| <b>CTNND1-V2</b>    | Catenin, delta 1 isoform 1ABC                                                                 | 0% | 2% | 0.00 |
| <b>DCI</b>          | Enoyl-CoA delta isomerase 1                                                                   | 0% | 1% | 0.00 |
| <b>DSC1</b>         | Desmocollin 1 isoform Dsc1a preproprotein                                                     | 0% | 6% | 0.00 |
| <b>DSG1</b>         | Desmoglein 1                                                                                  | 0% | 4% | 0.00 |
| <b>DSG2</b>         | Desmoglein 2                                                                                  | 0% | 4% | 0.00 |
| <b>DSG4</b>         | Desmoglein 4 isoform 2                                                                        | 0% | 5% | 0.00 |
| <b>ESR2</b>         | Estrogen receptor 2                                                                           | 0% | 6% | 0.00 |
| <b>EVPL</b>         | Envoplakin                                                                                    | 0% | 1% | 0.00 |
| <b>FCRL1</b>        | Fc receptor-like 1                                                                            | 0% | 4% | 0.00 |
| <b>FRS3</b>         | Fibroblast growth factor receptor substrate 3-                                                | 0% | 4% | 0.00 |
| <b>FXC1</b>         | Mitochondrial import inner membrane translocase subunit TIM9 B                                | 0% | 5% | 0.00 |
| <b>GLUD2</b>        | Glutamate dehydrogenase 2                                                                     | 0% | 5% | 0.00 |
| <b>GRIN2B</b>       | Glutamate receptor, ionotropic, N-methyl D-aspartate 2B                                       | 0% | 5% | 0.00 |
| <b>GRINA</b>        | Glutamate receptor, ionotropic, N-methyl D-aspartate-associated protein 1 (glutamate binding) | 0% | 5% | 0.00 |
| <b>IGF1</b>         | Insulin-like growth factor 1                                                                  | 0% | 7% | 0.00 |

**Supplemental Table 1. Reactivities of patient and control sera on protein microarrays\***

|                  |                                                                                   |    |    |      |
|------------------|-----------------------------------------------------------------------------------|----|----|------|
| <b>ITGAM</b>     | Integrin alpha M precursor                                                        | 0% | 7% | 0.00 |
| <b>ITGB7</b>     | Integrin, beta 7                                                                  | 0% | 5% | 0.00 |
| <b>NDUFA13</b>   | NADH dehydrogenase [ubiquinone] 1 alpha subcomplex subunit 13                     | 0% | 4% | 0.00 |
| <b>NDUFB6</b>    | NADH-ubiquinone oxidoreductase B17 subunit                                        | 0% | 7% | 0.00 |
| <b>NDUFC1</b>    | NADH-ubiquinone oxidoreductase KFYI subunit                                       | 0% | 5% | 0.00 |
| <b>OGDH</b>      | Oxoglutarate (alpha-ketoglutarate) dehydrogenase (lipoamide)                      | 0% | 2% | 0.00 |
| <b>OTC</b>       | Ornithine carbamoyltransferase                                                    | 0% | 5% | 0.00 |
| <b>PCDH18</b>    | Protocadherin 18 precursor                                                        | 0% | 2% | 0.00 |
| <b>PCDHGC5</b>   | ProtocadherinGamma subfamily C, 5 isoform 1                                       | 0% | 5% | 0.00 |
| <b>PCK1</b>      | Phosphoenolpyruvate carboxykinase, cytosolic [GTP]                                | 0% | 5% | 0.00 |
| <b>PDP2</b>      | Pyruvate dehydrogenase [Lipoamide]]-phosphatase 2                                 | 0% | 4% | 0.00 |
| <b>PMPCA</b>     | Mitochondrial processing peptidase alpha subunit                                  | 0% | 2% | 0.00 |
| <b>PRDX5</b>     | Peroxiredoxin 5                                                                   | 0% | 5% | 0.00 |
| <b>RNASEL</b>    | Ribonuclease L (2',5'-oligoadenylate synthetase-dependent)                        | 0% | 4% | 0.00 |
| <b>RTN4</b>      | Reticulon 4 (Neurite outgrowth inhibitor)                                         | 0% | 7% | 0.00 |
| <b>SLC25A21</b>  | Solute carrier family 25 (mitochondrial carrier; ornithine transporter) member 21 | 0% | 7% | 0.00 |
| <b>SLC25A6</b>   | solute carrier family 25 (mitochondrial carrier; citrate transporter), member 6   | 0% | 8% | 0.00 |
| <b>TGFBR2-V1</b> | TransformingGrowth factor, beta receptor II                                       | 0% | 6% | 0.00 |
| <b>TIMM10</b>    | Mitochondrial import inner membrane translocase subunit TIM10                     | 0% | 6% | 0.00 |
| <b>TIMM17A</b>   | Mitochondrial import inner membrane translocase subunit TIM17 A                   | 0% | 7% | 0.00 |
| <b>UQCRB-V2</b>  | Ubiquinol-cytochrome C reductase complex 14 kDa protein, isoform 2                | 0% | 6% | 0.00 |

\* The letter V with a number after the gene symbol indicates the protein transcriptional variant.
