# Supplementary material for: Pemphigus Vulgaris Autoantibody Profiling by Proteomic Technique
Source: PubMed Central journal article supplement (PMC3591405; doi:10.1371/journal.pone.0057587), 2013-03-07
Supplement: pone.0057587.s002.pdf [file pone.0057587.s002.pdf]

**Supplemental Table 2. Reactivities of Dsg3-positive patients' sera on protein microarrays.\***

| <b>Symbol</b> | <b>Number of patients</b> | <b>Percent of patients</b> |
|---------------|---------------------------|----------------------------|
| DSC3-V1**     | 114                       | 54%                        |
| DSC1          | 114                       | 54%                        |
| HLA-DRA_V2    | 113                       | 53%                        |
| PKP3          | 112                       | 53%                        |
| CHRM3         | 109                       | 51%                        |
| ATP2C1-V4     | 106                       | 50%                        |
| CD88, C5AR1   | 106                       | 50%                        |
| COL21A1_V2    | 106                       | 50%                        |
| ChrmE-B       | 106                       | 50%                        |
| ANXA8L1       | 104                       | 49%                        |
| ITGA2         | 102                       | 48%                        |
| ITGB5         | 101                       | 48%                        |
| PCDH12        | 101                       | 48%                        |
| CD1D          | 97                        | 46%                        |
| DSG3-EC4      | 96                        | 45%                        |
| CD59          | 96                        | 45%                        |
| ANXA5         | 93                        | 44%                        |
| COL2A1        | 92                        | 43%                        |
| CD80          | 92                        | 43%                        |
| CD23, FCER2   | 92                        | 43%                        |
| ChrM1-a       | 91                        | 43%                        |
| CD44          | 91                        | 43%                        |
| ITGB3BP-V1    | 91                        | 43%                        |
| HLA-DQB1      | 90                        | 42%                        |
| DSC3-V2       | 90                        | 42%                        |
| CD86          | 89                        | 42%                        |
| HLA-G         | 88                        | 42%                        |
| HLA-DQA1      | 87                        | 41%                        |
| COL1A1        | 85                        | 40%                        |
| HLA-DRB1      | 85                        | 40%                        |
| CD26, DPP4    | 83                        | 39%                        |
| HLA-DPA1      | 83                        | 39%                        |
| CD49e, ITGA5  | 83                        | 39%                        |
| IL1RAPL2      | 82                        | 39%                        |
| PC            | 82                        | 39%                        |
| PMP22         | 81                        | 38%                        |
| CHRNA1-V1     | 81                        | 38%                        |
| CDH1          | 81                        | 38%                        |
| PCDHAC2       | 81                        | 38%                        |
| CHRN4-V1      | 81                        | 38%                        |
| PERP          | 79                        | 37%                        |
| CACNA1C       | 79                        | 37%                        |
| CD56, NCAM2   | 78                        | 37%                        |
| ANXA3         | 78                        | 37%                        |
| OGFR          | 77                        | 36%                        |
| FCRLA         | 77                        | 36%                        |
| CHRNA5        | 77                        | 36%                        |
| DSG1-EC5      | 77                        | 36%                        |
| ACTA2         | 76                        | 36%                        |
| PDHA1         | 76                        | 36%                        |
| PMPCB         | 76                        | 36%                        |
| CHRM4         | 75                        | 35%                        |
| CACNG6        | 74                        | 35%                        |
| ITGA4         | 73                        | 34%                        |
| CHRM1         | 72                        | 34%                        |
| FH            | 72                        | 34%                        |
| CRAT          | 72                        | 34%                        |

**Supplemental Table 2. Reactivities of Dsg3-positive patients' sera on protein microarrays.\***

|                  |    |     |
|------------------|----|-----|
| MLYCD            | 72 | 34% |
| CD16a, FCGR3A    | 72 | 34% |
| PCDH10           | 71 | 33% |
| CD14             | 71 | 33% |
| ITGA7            | 71 | 33% |
| CD48             | 71 | 33% |
| CACNG2           | 70 | 33% |
| PCDHB12          | 70 | 33% |
| PANX1            | 70 | 33% |
| JUP-V2           | 69 | 33% |
| Chrm?10-B        | 69 | 33% |
| CD32, FCGR2B     | 68 | 32% |
| CD46             | 68 | 32% |
| CD4              | 68 | 32% |
| SDG1_Sc mix1     | 68 | 32% |
| COL8A1           | 68 | 32% |
| MAOB             | 67 | 32% |
| CHRNA1           | 67 | 32% |
| CDH4             | 66 | 31% |
| FDXR-V2          | 65 | 31% |
| PRODH            | 65 | 31% |
| SLC6A6-V1        | 65 | 31% |
| DSC2             | 64 | 30% |
| CHRNA1           | 64 | 30% |
| SOD3             | 64 | 30% |
| DSG1-EC1         | 64 | 30% |
| CD3E             | 63 | 30% |
| CD93             | 63 | 30% |
| CDH8-1           | 63 | 30% |
| HLA-DQB2         | 63 | 30% |
| CTNNA3-V2        | 63 | 30% |
| CD40             | 63 | 30% |
| HLA-E            | 62 | 29% |
| TGFBRAP1         | 62 | 29% |
| NDUFA13-3        | 61 | 29% |
| CHRNA1-V1-2      | 61 | 29% |
| FGR              | 61 | 29% |
| CD37             | 60 | 28% |
| CD66c, CEACAM6   | 59 | 28% |
| SOD2             | 59 | 28% |
| PDK4             | 59 | 28% |
| ALDH4A1          | 59 | 28% |
| DSG3-EC3         | 59 | 28% |
| ATP2C1-V2        | 58 | 27% |
| NMNAT2           | 57 | 27% |
| ME3              | 57 | 27% |
| FRS2             | 57 | 27% |
| FLT3             | 56 | 26% |
| CHRNA5           | 56 | 26% |
| NDUFS6           | 56 | 26% |
| CHRNA2-2a_SC mix | 56 | 26% |
| HLA-E_V2         | 55 | 26% |
| CD79a            | 55 | 26% |
| CD63             | 54 | 25% |
| ETFB-V2          | 54 | 25% |
| PXMP4            | 54 | 25% |
| CDH3             | 54 | 25% |
| CD33             | 53 | 25% |

**Supplemental Table 2. Reactivities of Dsg3-positive patients' sera on protein microarrays.\***

|               |    |     |
|---------------|----|-----|
| CD42B, GP1BA  | 53 | 25% |
| COL25A1       | 53 | 25% |
| ORAI1-V2      | 53 | 25% |
| COL23A1       | 53 | 25% |
| CD36          | 53 | 25% |
| CTNBL1        | 53 | 25% |
| CCKBR         | 53 | 25% |
| TIMM44        | 52 | 25% |
| DSG3-EC5      | 52 | 25% |
| ITGA8         | 52 | 25% |
| CHRNA4-V1     | 51 | 24% |
| CD64A, FCGR1A | 51 | 24% |
| ANXA9         | 51 | 24% |
| CHRM4         | 51 | 24% |
| CD81          | 50 | 24% |
| ChrmE-mix     | 50 | 24% |
| CYB5B         | 50 | 24% |
| EPS8L2        | 49 | 23% |
| NDUFA9        | 49 | 23% |
| ChrmE-M       | 48 | 23% |
| FCGR2B        | 48 | 23% |
| AKAP10        | 48 | 23% |
| SYNJ2BP       | 48 | 23% |
| CHRNA3        | 48 | 23% |
| GK2           | 48 | 23% |
| ATP2C1-V3     | 48 | 23% |
| CD34          | 47 | 22% |
| ETFA-V1       | 47 | 22% |
| ABAT-V1       | 47 | 22% |
| NDUFV3-V2     | 47 | 22% |
| PGR           | 47 | 22% |
| PCDHB5        | 47 | 22% |
| DSG1          | 46 | 22% |
| CHRNA4-V2     | 46 | 22% |
| CHRNA4-V1     | 46 | 22% |
| MET-V1        | 46 | 22% |
| NDUFV3-A      | 46 | 22% |
| CHRNA1        | 46 | 22% |
| HLA-C_V2      | 46 | 22% |
| CHRNA9        | 45 | 21% |
| ITGB1         | 45 | 21% |
| EPS15L1       | 45 | 21% |
| PCDHB15       | 45 | 21% |
| CD69          | 45 | 21% |
| CPT1B         | 45 | 21% |
| SDG1_SC mix2  | 45 | 21% |
| CTNBLIP1      | 45 | 21% |
| CHRNA2        | 45 | 21% |
| DSC1          | 44 | 21% |
| ACTA1         | 44 | 21% |
| CD19          | 44 | 21% |
| NDUFB10       | 44 | 21% |
| DSG3_EC1_BL   | 44 | 21% |
| CD100, SEMA4D | 43 | 20% |
| NR3C1         | 43 | 20% |
| BDKRB2        | 43 | 20% |
| CD75, ST6GAL1 | 43 | 20% |
| CD3E          | 42 | 20% |

**Supplemental Table 2. Reactivities of Dsg3-positive patients' sera on protein microarrays.\***

|                |    |     |
|----------------|----|-----|
| CD40_V2        | 42 | 20% |
| CDH9           | 42 | 20% |
| CD3G           | 42 | 20% |
| TIMM13         | 42 | 20% |
| DSG1_EC3_BL    | 42 | 20% |
| PMPCA          | 42 | 20% |
| CTNNAL1        | 42 | 20% |
| COL6A2         | 41 | 19% |
| ATP2A2-V1      | 41 | 19% |
| FGFR1-V5       | 41 | 19% |
| ME2            | 41 | 19% |
| CDH17-1        | 41 | 19% |
| NDUFB4         | 41 | 19% |
| CD98, SLC7A5   | 40 | 19% |
| HMGCL          | 40 | 19% |
| GLUD2-2        | 40 | 19% |
| SLC38A1        | 40 | 19% |
| CACNA2D1       | 40 | 19% |
| GRIA3          | 40 | 19% |
| CD74           | 39 | 18% |
| HADH           | 39 | 18% |
| TMLHE          | 39 | 18% |
| COL9A1_V2      | 39 | 18% |
| PDGFRA         | 39 | 18% |
| GPAM           | 39 | 18% |
| AR             | 38 | 18% |
| CTNNA1         | 38 | 18% |
| CD20, MS4A1    | 37 | 17% |
| CD98, SLC3A2   | 37 | 17% |
| CD14           | 37 | 17% |
| CD11C, ITGAX   | 37 | 17% |
| SLC7A8         | 37 | 17% |
| HBE1           | 36 | 17% |
| PCDHB9         | 36 | 17% |
| HK2            | 36 | 17% |
| CD66e,CEACAM5  | 36 | 17% |
| DSG1-EC2       | 36 | 17% |
| FCRLB          | 36 | 17% |
| MUPCDH         | 36 | 17% |
| SDHA           | 36 | 17% |
| COX17          | 36 | 17% |
| COL21A1        | 35 | 17% |
| COX10          | 35 | 17% |
| CD4            | 35 | 17% |
| HLA-A          | 35 | 17% |
| HLA-DPB1_V2    | 35 | 17% |
| NDUFA2         | 35 | 17% |
| CPT1A          | 35 | 17% |
| FECH-V1        | 35 | 17% |
| DSC2_SC mix    | 34 | 16% |
| NDUFA12        | 34 | 16% |
| DSG3_S2_SCBL21 | 34 | 16% |
| CKMT1B         | 34 | 16% |
| ATP2A2-V1      | 34 | 16% |
| CHRNA7         | 33 | 16% |
| CACNB4         | 33 | 16% |
| MTX1           | 33 | 16% |
| TIMM9          | 33 | 16% |

**Supplemental Table 2. Reactivities of Dsg3-positive patients' sera on protein microarrays.\***

|                  |    |     |
|------------------|----|-----|
| BDKRB1           | 33 | 16% |
| OGFRL1           | 33 | 16% |
| CHRNA2-1a_SC mix | 33 | 16% |
| ChrM1-b          | 32 | 15% |
| CD42a, GP9, GPIX | 32 | 15% |
| SLC36A4          | 32 | 15% |
| CD3D             | 32 | 15% |
| NDUFA4           | 32 | 15% |
| SDHD             | 32 | 15% |
| ANXA9            | 31 | 15% |
| PIGR             | 31 | 15% |
| DSG2             | 31 | 15% |
| CD99             | 31 | 15% |
| CD8B             | 31 | 15% |
| PCDHB10          | 31 | 15% |
| COX5B            | 31 | 15% |
| NDUFS1           | 31 | 15% |
| ATP2A2-V2        | 31 | 15% |
| ABCB7            | 31 | 15% |
| COL9A1           | 30 | 14% |
| HLA-DRB1         | 30 | 14% |
| CD13, ANPEP      | 30 | 14% |
| ITGA5            | 30 | 14% |
| MCCC2-1          | 30 | 14% |
| SUOX             | 30 | 14% |
| PCDH8-2          | 30 | 14% |
| PDK1             | 30 | 14% |
| FCRL5            | 29 | 14% |
| CD207            | 29 | 14% |
| SLC16A10         | 29 | 14% |
| MAOA             | 29 | 14% |
| CD11A, ITGAL-2   | 28 | 13% |
| COL20A1_V2       | 28 | 13% |
| CD10, MME        | 28 | 13% |
| CD96             | 28 | 13% |
| CD1D             | 28 | 13% |
| CD2              | 28 | 13% |
| ATP2A2-V2        | 28 | 13% |
| DHODH            | 28 | 13% |
| COX11            | 28 | 13% |
| IGHG2            | 27 | 13% |
| COL3A1           | 27 | 13% |
| NDUFB2           | 27 | 13% |
| UCP2             | 27 | 13% |
| DSG3_EC2_BL      | 27 | 13% |
| GK-V1            | 27 | 13% |
| CD71, TFRC       | 26 | 12% |
| GOT1             | 26 | 12% |
| ITGB2            | 26 | 12% |
| CDH13            | 26 | 12% |
| SLC25A5          | 26 | 12% |
| EPS8L1-V1        | 26 | 12% |
| CD36             | 25 | 12% |
| HLA-B            | 25 | 12% |
| CACNG7           | 25 | 12% |
| CD18, ITGB2      | 25 | 12% |
| UPK3B            | 25 | 12% |
| DSG3-V1          | 25 | 12% |

**Supplemental Table 2. Reactivities of Dsg3-positive patients' sera on protein microarrays.\***

|                  |    |     |
|------------------|----|-----|
| CD1B             | 25 | 12% |
| APLNR            | 25 | 12% |
| DSG3_S1_TM       | 25 | 12% |
| NDUFV1           | 25 | 12% |
| F2RL1            | 25 | 12% |
| CD50, ICAM3      | 24 | 11% |
| MTRR-V1          | 24 | 11% |
| COL1A2           | 24 | 11% |
| GRIN2A           | 24 | 11% |
| ITGB6            | 24 | 11% |
| DSG4             | 24 | 11% |
| FACL6            | 23 | 11% |
| CD92, SLC44A1    | 23 | 11% |
| CDS2             | 23 | 11% |
| CTNNA2           | 23 | 11% |
| GOT2             | 23 | 11% |
| MTRR-V2          | 22 | 10% |
| PKP4             | 22 | 10% |
| FGFRL1           | 22 | 10% |
| CRHR1            | 22 | 10% |
| CACNA1G-S2       | 22 | 10% |
| C1QBP            | 22 | 10% |
| DSG1_BL21        | 22 | 10% |
| CD69             | 21 | 10% |
| PMPCB            | 21 | 10% |
| CD5              | 21 | 10% |
| ORAI1-V1         | 21 | 10% |
| SLC25A17         | 21 | 10% |
| CD57, B3GAT1     | 20 | 9%  |
| NDUFS6           | 20 | 9%  |
| UCRC             | 20 | 9%  |
| CHRND            | 20 | 9%  |
| HTRA2            | 20 | 9%  |
| HRH2             | 20 | 9%  |
| CACNA1G-S3       | 20 | 9%  |
| ECHS1            | 20 | 9%  |
| COQ3             | 19 | 9%  |
| CD41, ITGA2B-2   | 19 | 9%  |
| CD66b, CEACAM8   | 19 | 9%  |
| NGFRAP1          | 19 | 9%  |
| CDH11            | 19 | 9%  |
| NDUFA7           | 19 | 9%  |
| SLC9A6           | 19 | 9%  |
| NDUFV2           | 19 | 9%  |
| MIPEP            | 18 | 8%  |
| CYCS             | 18 | 8%  |
| CD52             | 18 | 8%  |
| EPS8L3           | 18 | 8%  |
| DSG3_EC5_BL      | 18 | 8%  |
| UQCRQ            | 17 | 8%  |
| CACNA1S-s3       | 17 | 8%  |
| DSC3_S1_TM       | 17 | 8%  |
| PPIF             | 17 | 8%  |
| IGF1R            | 17 | 8%  |
| BAD              | 17 | 8%  |
| CHRNA2-1b_SC mix | 17 | 8%  |
| FLT3LG           | 17 | 8%  |
| ACTG2            | 16 | 8%  |

**Supplemental Table 2. Reactivities of Dsg3-positive patients' sera on protein microarrays.\***

|                |    |    |
|----------------|----|----|
| DSG2           | 16 | 8% |
| MTX2-V1        | 16 | 8% |
| NDUFV3-V1      | 16 | 8% |
| Chrm?10-B1     | 16 | 8% |
| NDUFA1         | 16 | 8% |
| CD29, ITGB2    | 16 | 8% |
| FCGRT          | 16 | 8% |
| AGTR1          | 16 | 8% |
| DSG1           | 15 | 7% |
| SCP3           | 15 | 7% |
| FPGS           | 15 | 7% |
| TIMM22         | 15 | 7% |
| CD3G           | 14 | 7% |
| UQCRFS1        | 14 | 7% |
| CD9            | 14 | 7% |
| TSPO           | 14 | 7% |
| CKMT2          | 14 | 7% |
| DSC3           | 14 | 7% |
| PTH1R          | 13 | 6% |
| CD8A           | 13 | 6% |
| CD47           | 13 | 6% |
| CD97           | 13 | 6% |
| CD66d, CEACAM3 | 13 | 6% |
| SLC25A19       | 13 | 6% |
| SLC25A15       | 13 | 6% |
| CD58           | 13 | 6% |
| CHRM2          | 13 | 6% |
| SLC36A2        | 13 | 6% |
| COLQ           | 13 | 6% |
| HSPD1          | 13 | 6% |
| CDH24          | 13 | 6% |
| CDH16          | 13 | 6% |
| CD27           | 12 | 6% |
| ANXA4          | 12 | 6% |
| CD1A           | 12 | 6% |
| CD28           | 12 | 6% |
| CD55           | 12 | 6% |
| NDUFV1-V1      | 12 | 6% |
| NDUFA13-2      | 12 | 6% |
| SLC25A39       | 12 | 6% |
| TACR1          | 12 | 6% |
| COL5A1         | 12 | 6% |
| CD66f, PSG1    | 12 | 6% |
| PCDH20         | 12 | 6% |
| HLA-DQA1       | 12 | 6% |
| SLC25A20       | 12 | 6% |
| GCDH-V1        | 11 | 5% |
| WARS2          | 11 | 5% |
| ITGB1BP1       | 11 | 5% |
| CD19           | 11 | 5% |
| IGHG2          | 11 | 5% |
| CD90, THY1     | 11 | 5% |
| AKAP1          | 11 | 5% |
| SCP2           | 11 | 5% |
| CD89, FCAR     | 11 | 5% |
| COX6A1         | 11 | 5% |
| OXA1L          | 11 | 5% |
| NDUFB1-b       | 11 | 5% |

**Supplemental Table 2. Reactivities of Dsg3-positive patients' sera on protein microarrays.\***

|             |    |    |
|-------------|----|----|
| UQCRC2      | 10 | 5% |
| FCRL4       | 10 | 5% |
| ANXA8L2     | 10 | 5% |
| PXMP3       | 10 | 5% |
| BCL2        | 10 | 5% |
| CD40        | 10 | 5% |
| FLT4        | 10 | 5% |
| CD83        | 10 | 5% |
| PMP2        | 10 | 5% |
| TOMM40      | 10 | 5% |
| ITGAV       | 10 | 5% |
| CD94, KLRD1 | 10 | 5% |
| PCCB        | 10 | 5% |
| CDH7        | 10 | 5% |
| CHRNA9      | 10 | 5% |
| CD86        | 10 | 5% |
| NDUFS4      | 10 | 5% |
| Chrn?10-mix | 10 | 5% |
| NDUFB5      | 10 | 5% |
| VDAC2       | 10 | 5% |
| CD79b       | 9  | 4% |
| CS          | 9  | 4% |
| HLA-F       | 9  | 4% |
| CD73, NT5E  | 9  | 4% |
| UQCRB       | 9  | 4% |
| BCKDK-V2    | 9  | 4% |
| Chrn?10-mix | 9  | 4% |
| IGFBP2      | 9  | 4% |
| SLC25A14    | 9  | 4% |
| IGF2R       | 9  | 4% |
| CD24        | 9  | 4% |
| PCDHB1      | 9  | 4% |
| CHRNA6      | 9  | 4% |
| DSC1        | 9  | 4% |
| HSPE1       | 9  | 4% |
| ACTC1       | 9  | 4% |
| ATP5O       | 9  | 4% |
| HLA-C       | 9  | 4% |
| GPX4        | 9  | 4% |
| LARS2       | 9  | 4% |
| PCCA        | 9  | 4% |
| DSG1_EC4_BL | 9  | 4% |
| MTX2-V2     | 9  | 4% |
| ITGB1BP2    | 8  | 4% |
| MDH2        | 8  | 4% |
| ANXA1       | 8  | 4% |
| IGF2        | 8  | 4% |
| TOMM70A     | 8  | 4% |
| TOMM20      | 8  | 4% |
| AK2         | 8  | 4% |
| DSG1        | 8  | 4% |
| CHRN3       | 8  | 4% |
| COX4I1      | 8  | 4% |
| CD5         | 8  | 4% |
| CD68        | 8  | 4% |
| SLC25A12    | 8  | 4% |
| MCCC1       | 8  | 4% |
| HLA-DQB1    | 8  | 4% |



**Supplemental Table 2. Reactivities of Dsg3-positive patients' sera on protein microarrays.\***

|               |   |    |
|---------------|---|----|
| FCRL2         | 7 | 3% |
| CACNA1G-S2    | 7 | 3% |
| HLCS          | 7 | 3% |
| DLAT          | 7 | 3% |
| DSG4_SC mix2  | 7 | 3% |
| PCDHB11       | 7 | 3% |
| CD80          | 7 | 3% |
| ITGAX         | 7 | 3% |
| CD43, SPN     | 7 | 3% |
| ANXA6         | 7 | 3% |
| COL4A3BP      | 7 | 3% |
| PCDHB13       | 7 | 3% |
| MYCBP         | 7 | 3% |
| TIMM8B        | 7 | 3% |
| COX6A2        | 7 | 3% |
| CD85, LILRB1  | 7 | 3% |
| CACNA1S-s2    | 7 | 3% |
| DSG3_25-88_BL | 7 | 3% |
| UPK2          | 6 | 3% |
| CDH20         | 6 | 3% |
| PERP          | 6 | 3% |
| PERP          | 6 | 3% |
| GRB7          | 6 | 3% |
| PDGFRL        | 6 | 3% |
| GPT           | 6 | 3% |
| SLC25A17      | 6 | 3% |
| ChrM1-b1      | 6 | 3% |
| NDUFS3        | 6 | 3% |
| COL9A3        | 6 | 3% |
| PDHX-V1       | 6 | 3% |
| TIMM17B       | 6 | 3% |
| DSG3          | 6 | 3% |
| CD95, FAS     | 6 | 3% |
| CHRM5         | 6 | 3% |
| CHRFAM7A      | 6 | 3% |
| CD70          | 6 | 3% |
| CDH2          | 6 | 3% |
| CTNNB1        | 6 | 3% |
| CHRNA3        | 6 | 3% |
| CACNG3        | 6 | 3% |
| PCDH21        | 6 | 3% |
| CD1C          | 6 | 3% |
| HRH1          | 6 | 3% |
| NNT-1         | 6 | 3% |
| ITGAL-1       | 6 | 3% |
| GATM          | 6 | 3% |
| DIABLO        | 6 | 3% |
| OXCT1         | 6 | 3% |
| DSG2          | 6 | 3% |
| CPT2          | 5 | 2% |
| CD7           | 5 | 2% |
| COL4A6        | 5 | 2% |
| ACTB          | 5 | 2% |
| SLC25A1       | 5 | 2% |
| ATP2C1-V2     | 5 | 2% |
| HLA-DRA       | 5 | 2% |
| TK2           | 5 | 2% |
| SLC6A6-V3     | 5 | 2% |

**Supplemental Table 2. Reactivities of Dsg3-positive patients' sera on protein microarrays.\***

|             |   |    |
|-------------|---|----|
| COL19A1     | 5 | 2% |
| GRB2        | 5 | 2% |
| CACNG4      | 5 | 2% |
| SHMT1       | 5 | 2% |
| PERP        | 5 | 2% |
| CHRNA6      | 5 | 2% |
| CDH19       | 5 | 2% |
| TIMM23      | 5 | 2% |
| AGTRAP      | 5 | 2% |
| PPOX        | 5 | 2% |
| NDUFS2      | 5 | 2% |
| ITGB8       | 5 | 2% |
| CHRNA1-V1-3 | 5 | 2% |
| AK3         | 5 | 2% |
| CTNND1-V1   | 5 | 2% |
| NDUFA5      | 5 | 2% |
| SURF1       | 5 | 2% |
| CDH23       | 5 | 2% |
| CD83        | 5 | 2% |
| CHRNA4-V2   | 5 | 2% |
| ALAS1-V1    | 5 | 2% |
| DSG3_S2_TM  | 5 | 2% |
| BCAT2       | 5 | 2% |
| UCRC        | 5 | 2% |
| CD9         | 5 | 2% |
| COX6C       | 5 | 2% |
| FDX1        | 5 | 2% |
| CACNB1      | 5 | 2% |
| HRH4        | 5 | 2% |
| SLC25A11    | 5 | 2% |
| NFS2        | 5 | 2% |
| NFS1        | 5 | 2% |
| SLC25A4     | 5 | 2% |
| COL10A1     | 5 | 2% |
| PERP        | 5 | 2% |
| DSG4        | 5 | 2% |
| CTNNA3-V1   | 4 | 2% |
| CKMT2       | 4 | 2% |
| DSC2        | 4 | 2% |
| BCKDHB-V1   | 4 | 2% |
| PCDHB14     | 4 | 2% |
| DBT         | 4 | 2% |
| F2RL2       | 4 | 2% |
| SLC25A10    | 4 | 2% |
| HCCS        | 4 | 2% |
| DNAJA3-V1   | 4 | 2% |
| SLC25A31    | 4 | 2% |
| ACTG1       | 4 | 2% |
| C5orf39     | 4 | 2% |
| DLD         | 4 | 2% |
| GRIA2-V2    | 4 | 2% |
| PERP        | 4 | 2% |
| CACNA1G-S1  | 4 | 2% |
| ATP5A1      | 4 | 2% |
| PCDHB16     | 4 | 2% |
| COL20A1     | 4 | 2% |
| HK1-V4      | 4 | 2% |
| NDUFA10     | 4 | 2% |

**Supplemental Table 2. Reactivities of Dsg3-positive patients' sera on protein microarrays.\***

|                |   |    |
|----------------|---|----|
| PKP2           | 4 | 2% |
| ABCD4          | 4 | 2% |
| DSG3-EC1       | 4 | 2% |
| ACTN2          | 4 | 2% |
| UPK1B          | 4 | 2% |
| CDH12          | 4 | 2% |
| ACADSB         | 4 | 2% |
| JUP-V1         | 4 | 2% |
| DSG1_EC1_BL    | 4 | 2% |
| DSG3_EC4_BL    | 4 | 2% |
| HADHA          | 4 | 2% |
| SLC7A13        | 4 | 2% |
| VDAC3          | 4 | 2% |
| TOMM40         | 4 | 2% |
| AK3L1-V7       | 4 | 2% |
| SLC25A2        | 4 | 2% |
| ABCB6          | 4 | 2% |
| CHRNA4-V2      | 3 | 1% |
| TST            | 3 | 1% |
| CD72           | 3 | 1% |
| ACADS          | 3 | 1% |
| CD70           | 3 | 1% |
| COL6A1         | 3 | 1% |
| ACSL3          | 3 | 1% |
| MLYCD          | 3 | 1% |
| ATP2C1-V1      | 3 | 1% |
| YWHAE          | 3 | 1% |
| SLC25A18       | 3 | 1% |
| HLA-A_V2       | 3 | 1% |
| ATP2C1-V3      | 3 | 1% |
| CD84           | 3 | 1% |
| CD82           | 3 | 1% |
| CD38           | 3 | 1% |
| CD8B           | 3 | 1% |
| CD66a, CEACAM1 | 3 | 1% |
| GSR            | 3 | 1% |
| CHRNA7         | 3 | 1% |
| ATP7B          | 3 | 1% |
| ESR1-V4        | 3 | 1% |
| KIF1B          | 3 | 1% |
| DSG4_SC mix1   | 3 | 1% |
| DSG1_1-496_BL  | 3 | 1% |
| UCP3           | 3 | 1% |
| CD1A           | 3 | 1% |
| FCRL3          | 3 | 1% |
| MGST1          | 3 | 1% |
| DSG3-V2        | 3 | 1% |
| SHMT2          | 3 | 1% |
| SLC38A2        | 3 | 1% |
| FECH           | 3 | 1% |
| ITGA2B-1       | 3 | 1% |
| DSG3_EC3_BL    | 3 | 1% |
| EPS8           | 3 | 1% |
| PEMT           | 3 | 1% |
| CHRNA3         | 3 | 1% |
| DSG3 #20_SC mi | 3 | 1% |
| CACNG1         | 2 | 1% |
| CKMT1A         | 2 | 1% |

**Supplemental Table 2. Reactivities of Dsg3-positive patients' sera on protein microarrays.\***

|               |   |    |
|---------------|---|----|
| IRF8          | 2 | 1% |
| PCDH1         | 2 | 1% |
| CTNND2        | 2 | 1% |
| PDGFRB        | 2 | 1% |
| DSG4          | 2 | 1% |
| ITGA9         | 2 | 1% |
| BDH1-V2       | 2 | 1% |
| LONP1         | 2 | 1% |
| GRIA1         | 2 | 1% |
| DSC3_S2_TM    | 2 | 1% |
| TGFBR3        | 2 | 1% |
| OAT           | 2 | 1% |
| PCDHB7        | 2 | 1% |
| SLC7A10       | 2 | 1% |
| CD77, A4GALT  | 2 | 1% |
| HLA-DPB1      | 2 | 1% |
| ETFDH         | 2 | 1% |
| CHRNA1-V1     | 2 | 1% |
| DSG1-EC3      | 2 | 1% |
| DSG1          | 2 | 1% |
| SLC25A13      | 2 | 1% |
| CD8A          | 2 | 1% |
| TK1           | 2 | 1% |
| CDH15         | 2 | 1% |
| CHRNA7        | 2 | 1% |
| ANXA2         | 2 | 1% |
| ATP2C1-V1     | 2 | 1% |
| EVPL-S1       | 2 | 1% |
| ACADVL-2      | 2 | 1% |
| ANXA11        | 2 | 1% |
| PCDH17-2      | 2 | 1% |
| NLN-1         | 2 | 1% |
| DSG3_1-161_BL | 2 | 1% |
| CACNA1S-s1    | 2 | 1% |
| GRIN2C        | 2 | 1% |
| MUT           | 2 | 1% |
| CACNA2D4      | 2 | 1% |
| SDHC          | 2 | 1% |
| SLC25A27      | 2 | 1% |
| DSG3-EC2      | 2 | 1% |
| NDUFC2        | 2 | 1% |
| PDK2          | 2 | 1% |
| CDH18         | 2 | 1% |
| ChmE-M1       | 2 | 1% |
| MCCC2-2       | 2 | 1% |
| GLUD1         | 2 | 1% |
| PDHA2         | 2 | 1% |
| NDUFV3-B      | 2 | 1% |
| NDUFB1-a      | 2 | 1% |
| NDUFA3        | 2 | 1% |
| DSG1_ECA_BL   | 2 | 1% |
| DSG1_EC2_BL   | 2 | 1% |
| PDK3          | 2 | 1% |
| BCKDHA        | 2 | 1% |
| COX7A2        | 2 | 1% |
| SDHB          | 2 | 1% |
| NNT-2         | 2 | 1% |
| COL24A1       | 2 | 1% |

**Supplemental Table 2. Reactivities of Dsg3-positive patients' sera on protein microarrays.\***

|             |   |    |
|-------------|---|----|
| ACADL       | 2 | 1% |
| COX4I2      | 2 | 1% |
| CYC1        | 2 | 1% |
| COL14A1     | 2 | 1% |
| ITGB1BP3    | 1 | 0% |
| TGFBR1      | 1 | 0% |
| FGFR2       | 1 | 0% |
| CKMT1A      | 1 | 0% |
| ACADM-V3    | 1 | 0% |
| ACSL1       | 1 | 0% |
| COL18A1     | 1 | 0% |
| PERP        | 1 | 0% |
| AIFM1       | 1 | 0% |
| CD28        | 1 | 0% |
| ABCB8       | 1 | 0% |
| PCDHB2      | 1 | 0% |
| ChrM1-a1    | 1 | 0% |
| DSG3        | 1 | 0% |
| EPS8L1-V2   | 1 | 0% |
| ALDH2       | 1 | 0% |
| DSC2        | 1 | 0% |
| ACADVL-1    | 1 | 0% |
| ChrmE-mix   | 1 | 0% |
| CHRM5       | 1 | 0% |
| ITGBL1      | 1 | 0% |
| DSG1-EC4    | 1 | 0% |
| NME4        | 1 | 0% |
| NDUFA6      | 1 | 0% |
| CHRNA2      | 1 | 0% |
| CD62P, SELP | 1 | 0% |
| PRDX6       | 1 | 0% |
| NDUFB8      | 1 | 0% |
| CHRN2       | 1 | 0% |
| CDH6        | 1 | 0% |
| F2RL3       | 1 | 0% |
| NDUFB7      | 1 | 0% |
| CACNG5      | 1 | 0% |
| GRIN2D      | 1 | 0% |
| COX7A1      | 1 | 0% |
| GSTK1-V1    | 1 | 0% |
| EVPL-S3     | 1 | 0% |
| UQCRH       | 1 | 0% |
| ANXA10      | 1 | 0% |
| COX5A       | 1 | 0% |
| PCDHB3      | 1 | 0% |
| NDUFB9      | 1 | 0% |
| F2R         | 1 | 0% |
| ITGB3BP-V2  | 1 | 0% |
| ACSL4       | 1 | 0% |
| CACNB4      | 1 | 0% |
| PCDHB8      | 1 | 0% |
| GRB14       | 1 | 0% |
| ATP2C1-V4   | 1 | 0% |
| NR3C2       | 1 | 0% |
| SLC25A3     | 1 | 0% |
| NDUFB3      | 1 | 0% |
| UQCRC1      | 1 | 0% |
| SLC38A7     | 1 | 0% |

**Supplemental Table 2. Reactivities of Dsg3-positive patients' sera on protein microarrays.\***

|                  |   |    |
|------------------|---|----|
| CHRM2            | 1 | 0% |
| NDUFS5           | 1 | 0% |
| UCP1             | 1 | 0% |
| DSG3_S1_SCBL21   | 1 | 0% |
| EGFR             | 1 | 0% |
| CACNA1G          | 1 | 0% |
| HADHB            | 1 | 0% |
| ETFB-V1          | 1 | 0% |
| GSTK1-V2         | 1 | 0% |
| CHRFAM7A         | 0 | 0% |
| CHRNA1           | 0 | 0% |
| ANXA13           | 0 | 0% |
| UPK3A            | 0 | 0% |
| TACR3            | 0 | 0% |
| UPK1A            | 0 | 0% |
| CHRNA4-V2        | 0 | 0% |
| CHRNA4-V1        | 0 | 0% |
| CCKAR            | 0 | 0% |
| PCDHB4           | 0 | 0% |
| ITGB3            | 0 | 0% |
| PKP1             | 0 | 0% |
| CHRM3            | 0 | 0% |
| ALDH1B1          | 0 | 0% |
| NDUFA12          | 0 | 0% |
| ANXA7            | 0 | 0% |
| ITGA3            | 0 | 0% |
| VDAC1            | 0 | 0% |
| SLC25A32         | 0 | 0% |
| CD6              | 0 | 0% |
| CTNND1-V2        | 0 | 0% |
| CD54 ICAM1       | 0 | 0% |
| CD87, PLAUR      | 0 | 0% |
| CD31, PECAM1     | 0 | 0% |
| DSC1             | 0 | 0% |
| ATP5A1           | 0 | 0% |
| NDUFB6           | 0 | 0% |
| PCDHGC5          | 0 | 0% |
| NDUFA13-1        | 0 | 0% |
| RNASEL           | 0 | 0% |
| DSG1             | 0 | 0% |
| CHRNA1           | 0 | 0% |
| CHRNA1-V1        | 0 | 0% |
| CHRNA9           | 0 | 0% |
| CD62L, SELL      | 0 | 0% |
| RTN4             | 0 | 0% |
| BCAT2            | 0 | 0% |
| BCKDK-V1         | 0 | 0% |
| EVPL             | 0 | 0% |
| NDUFC1           | 0 | 0% |
| CACNA1S          | 0 | 0% |
| CHRNA2-2b_SC mix | 0 | 0% |
| PMPCA            | 0 | 0% |
| PCK1             | 0 | 0% |
| ITGB7            | 0 | 0% |
| UQCRB            | 0 | 0% |
| PDP2             | 0 | 0% |
| ABCB9-V4         | 0 | 0% |
| TIMM17A          | 0 | 0% |

**Supplemental Table 2. Reactivities of Dsg3-positive patients' sera on protein microarrays.\***

|           |   |    |
|-----------|---|----|
| IGF1      | 0 | 0% |
| ALAS2-V2  | 0 | 0% |
| GRINA     | 0 | 0% |
| TGFBR2-V1 | 0 | 0% |
| FCRL1     | 0 | 0% |
| FXC1      | 0 | 0% |
| PRDX5     | 0 | 0% |
| OTC       | 0 | 0% |
| FRS3      | 0 | 0% |
| ITGAM     | 0 | 0% |
| ESR2-Vc   | 0 | 0% |
| GRIN2B    | 0 | 0% |
| TIMM10    | 0 | 0% |
| ChmE-B1   | 0 | 0% |
| DCI       | 0 | 0% |
| DSG4      | 0 | 0% |
| DSG2      | 0 | 0% |
| SLC25A6   | 0 | 0% |
| SLC25A21  | 0 | 0% |
| GLUD2-1   | 0 | 0% |
| OGDH-V1   | 0 | 0% |

\*The total number of patients' sera was 212, because it included Dsg3 antibody positive samples identified by standard ELISA.

\*\* Letter V with a number after the gene symbol indicates the protein transcriptional variant.
